# Supplementary material for: Density Functional Theory Study of CuAg Bimetal Electrocatalyst for CO2RR to Produce CH3OH
Source: MDPI journal article supplement (doi:10.3390/catal14010007), 2023-12-20
Supplement: s1 [file s1]

# Electronic Supplementary Information

## Density Functional Theory Study of CuAg Bimetal Electrocatalyst for CO<sub>2</sub>RR to Produce CH<sub>3</sub>OH

Sensen Xue <sup>1</sup>, Xingyou Liang <sup>1</sup>, Qing Zhang <sup>1</sup>, Xuefeng Ren <sup>2</sup>, Ligu Gao <sup>1</sup>, Tingli Ma <sup>3,4</sup> and Anmin Liu <sup>1,\*</sup>

<sup>1</sup> State Key Laboratory of Fine Chemicals, School of Chemical Engineering, Dalian University of Technology, Dalian 116081, China; xuess@mail.dlut.edu.cn (S.X.)

<sup>2</sup> School of Ocean Science and Technology, Dalian University of Technology, Panjin 124221, China

<sup>3</sup> Department of Materials Science and Engineering, China Jiliang University, Hangzhou 310018, China; tinglima@life.kyutech.ac.jp

<sup>4</sup> Graduate School of Life Science and Systems Engineering, Kyushu Institute of Technology, 2-4 Hibikino, Wakamatsu, Kitakyushu 808-0196, Fukuoka, Japan

\* Correspondence: liuanmin@dlut.edu.cn

**Table S1.** The energy of Ag<sub>3</sub> clusters.

| isomers  | $E_{Ag_3}/\text{Ha}$ | $E_B/\text{Ha}$ |
|----------|----------------------|-----------------|
| straight | -15598.809           | -0.100          |
| triangle | -15598.810           | -0.100          |

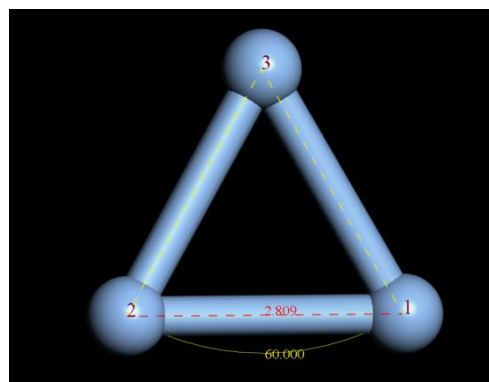

**Figure S1.** The most stable structure of Ag<sub>3</sub> clusters.

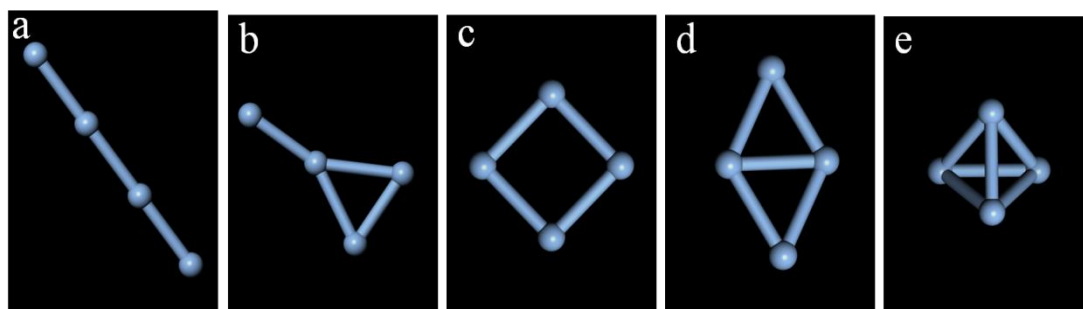

**Figure S2.** The isomeric structure of Ag<sub>4</sub> clusters.

**Table S2.** The energy of Ag<sub>4</sub> clusters.

| isomers | $E_{Ag_4}/Ha$ | $E_B/Ha$ |
|---------|---------------|----------|
| a       | -20798.427    | -0.147   |
| b       | -20798.444    | -0.165   |
| c       | -20798.426    | -0.146   |
| d       | -20798.449    | -0.169   |
| e       | -20798.417    | -0.138   |

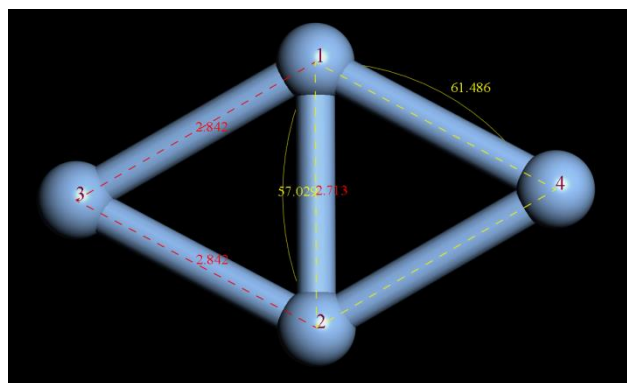**Figure S3.** The most stable structure of Ag<sub>4</sub> clusters.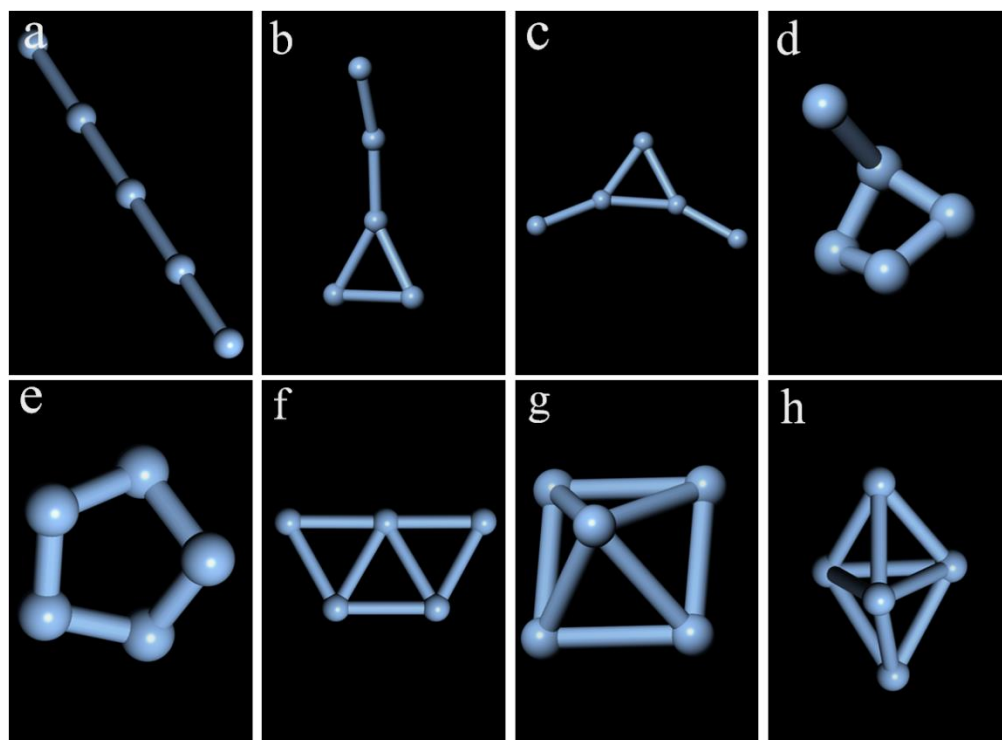**Figure S4.** The isomeric structure of Ag<sub>5</sub> clusters.

**Table S3.** The energy of Ag<sub>5</sub> clusters.

| isomers | $E_{Ag5}/Ha$ | $E_B/Ha$ |
|---------|--------------|----------|
| a       | -25998.036   | -0.187   |
| b       | -25998.050   | -0.201   |
| c       | -25998.053   | -0.204   |
| d       | -25998.064   | -0.215   |
| e       | -25998.065   | -0.215   |
| f       | -25998.080   | -0.231   |
| g       | -25998.061   | -0.211   |
| h       | -25998.065   | -0.215   |

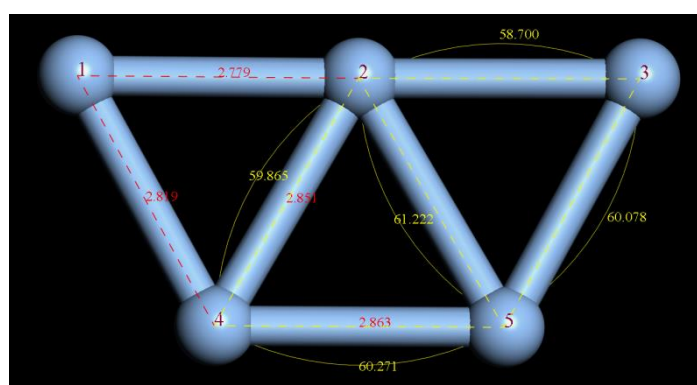**Figure S5.** The most stable structure of Ag<sub>5</sub> clusters.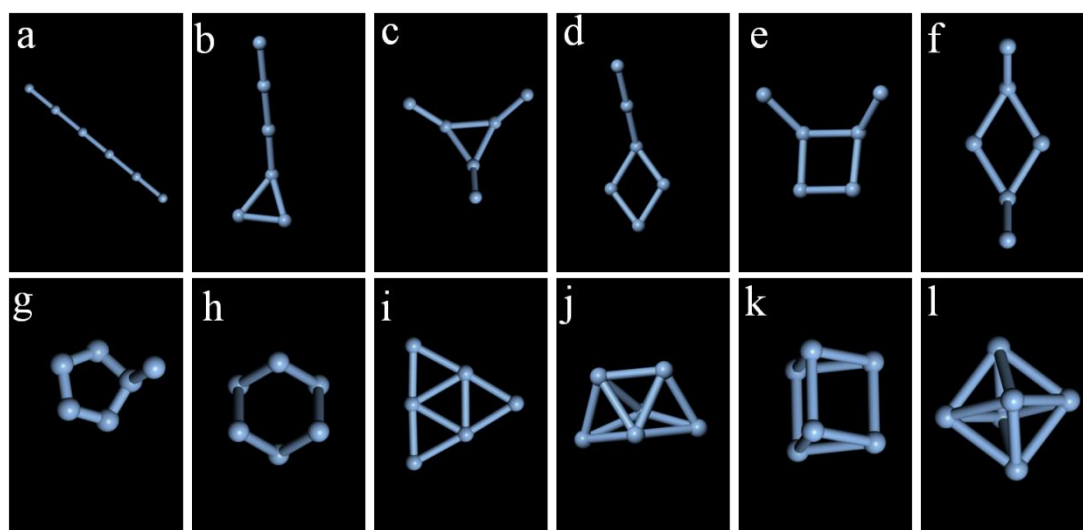**Figure S6.** The isomeric structure of Ag<sub>6</sub> clusters.

**Table S4.** The energy of Ag<sub>6</sub> clusters.

| isomers | $E_{Ag6}/Ha$ | $E_B/Ha$ |
|---------|--------------|----------|
| a       | -31197.650   | -0.232   |
| b       | -31197.671   | -0.252   |
| c       | -31197.679   | -0.261   |
| d       | -31197.662   | -0.243   |
| e       | -31197.692   | -0.273   |
| f       | -31197.673   | -0.254   |
| g       | -31197.677   | -0.258   |
| h       | -31197.724   | -0.305   |
| i       | -31197.698   | -0.279   |
| j       | -31197.729   | -0.310   |
| k       | -31197.698   | -0.279   |
| l       | -31197.688   | -0.269   |

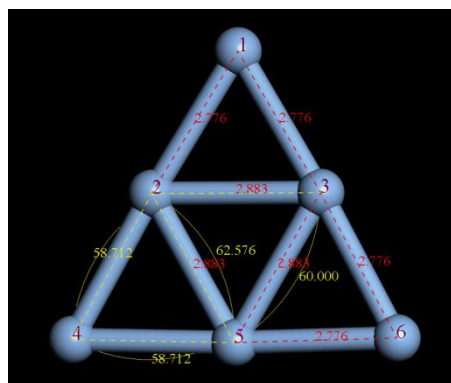**Figure S7.** The most stable structure of Ag<sub>6</sub> clusters.**Table S5.** The average binding energy of Ag<sub>n</sub> (n=1~6) clusters.

| n | $E_B/eV$ | $E_b/eV$ |
|---|----------|----------|
| 1 | 0        | 0        |
| 2 | -1.776   | -0.888   |
| 3 | -2.726   | -0.909   |
| 4 | -4.606   | -1.152   |
| 5 | -6.290   | -1.258   |
| 6 | -8.441   | -1.407   |

**Table S6.** The energy of Cu<sub>1</sub>Ag<sub>5</sub> clusters.

| isomers | $E_{CuAg}/Ha$ | $E_B/Ha$ | $E_B/eV$ | $E_b/eV$ |
|---------|---------------|----------|----------|----------|
| a       | -27638.468    | -0.329   | -8.964   | -1.494   |
| b       | -27638.464    | -0.325   | -8.850   | -1.475   |

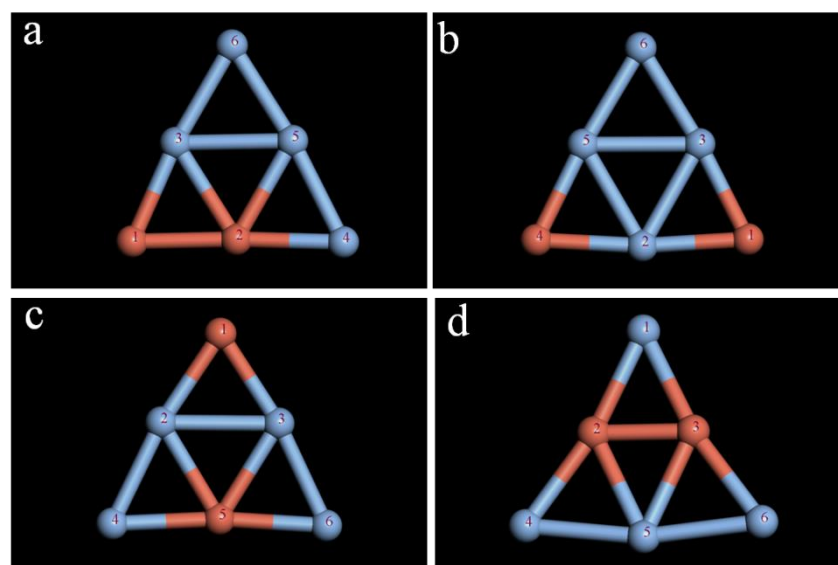

Figure S8. The isomeric structure of  $\text{Cu}_2\text{Ag}_4$  clusters.

Table S7. The energy of  $\text{Cu}_2\text{Ag}_4$  clusters.

| isomers | $E_{\text{CuAg}}/\text{Ha}$ | $E_B/\text{Ha}$ | $E_B/\text{eV}$ | $E_b/\text{eV}$ |
|---------|-----------------------------|-----------------|-----------------|-----------------|
| a       | -24079.204                  | -0.346          | -9.418          | -1.570          |
| b       | -24079.198                  | -0.340          | -9.255          | -1.542          |
| c       | -24079.201                  | -0.344          | -9.365          | -1.561          |
| d       | -24079.208                  | -0.351          | -9.541          | -1.590          |

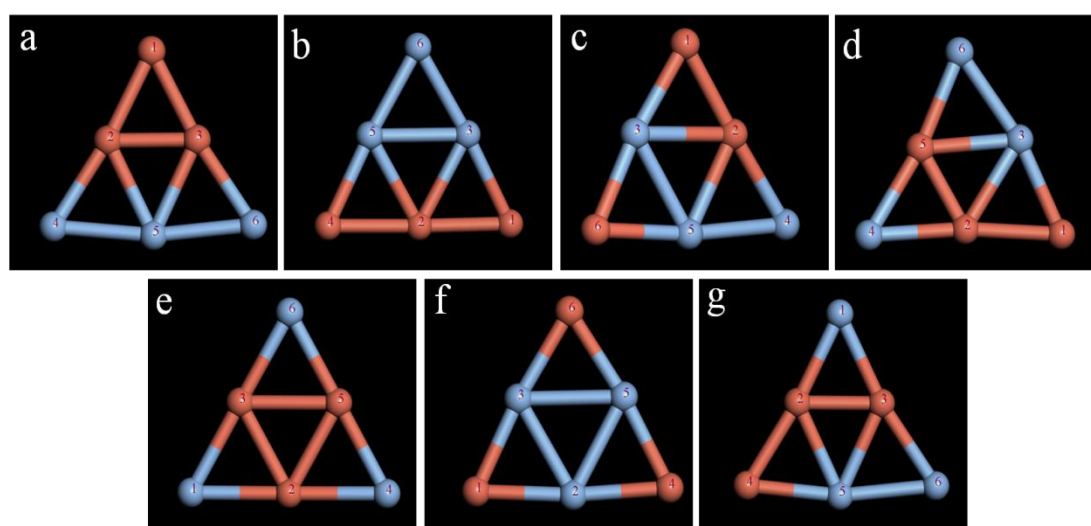

Figure S9. The isomeric structure of  $\text{Cu}_3\text{Ag}_3$  clusters.

**Table S8.** The energy of  $\text{Cu}_3\text{Ag}_3$  clusters.

| isomers | $E_{\text{CuAg}}/\text{Ha}$ | $E_B/\text{Ha}$ | $E_B/\text{eV}$ | $E_b/\text{eV}$ |
|---------|-----------------------------|-----------------|-----------------|-----------------|
| a       | -20519.939                  | -0.362          | -9.860          | -1.643          |
| b       | -20519.946                  | -0.369          | -10.033         | -1.672          |
| c       | -20519.943                  | -0.367          | -9.978          | -1.663          |
| d       | -20519.937                  | -0.360          | -9.807          | -1.635          |
| e       | -20519.932                  | -0.355          | -9.656          | -1.609          |
| f       | -20519.950                  | -0.373          | -10.153         | -1.692          |
| g       | -20519.943                  | -0.367          | -9.978          | -1.663          |

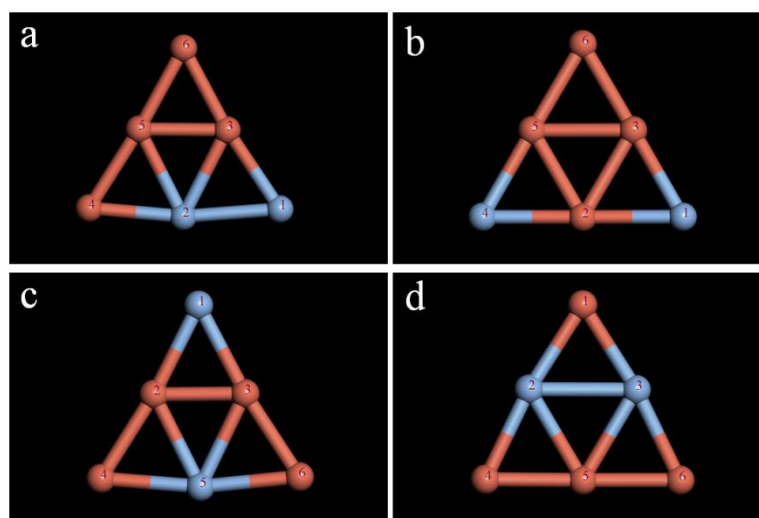**Figure S10.** The isomeric structure of  $\text{Cu}_4\text{Ag}_2$  clusters.**Table S9.** The energy of  $\text{Cu}_4\text{Ag}_2$  clusters.

| isomers | $E_{\text{CuAg}}/\text{Ha}$ | $E_B/\text{Ha}$ | $E_B/\text{eV}$ | $E_b/\text{eV}$ |
|---------|-----------------------------|-----------------|-----------------|-----------------|
| a       | -16960.680                  | -0.384          | -10.460         | -1.743          |
| b       | -16960.687                  | -0.391          | -10.633         | -1.772          |
| c       | -16960.679                  | -0.383          | -10.408         | -1.735          |
| d       | -16960.673                  | -0.377          | -10.247         | -1.708          |

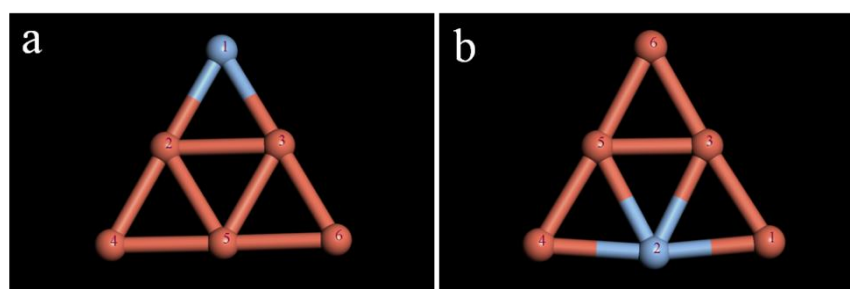**Figure S11.** The isomeric structure of  $\text{Cu}_5\text{Ag}_1$  clusters.

**Table S10.** The energy of Cu<sub>5</sub>Ag<sub>1</sub> clusters.

| isomers | $E_{\text{CuAg}}/\text{Ha}$ | $E_B/\text{Ha}$ | $E_B/\text{eV}$ | $E_b/\text{eV}$ |
|---------|-----------------------------|-----------------|-----------------|-----------------|
| a       | -13401.423                  | -0.408          | -11.099         | -1.850          |
| b       | -13401.415                  | -0.400          | -10.882         | -1.814          |

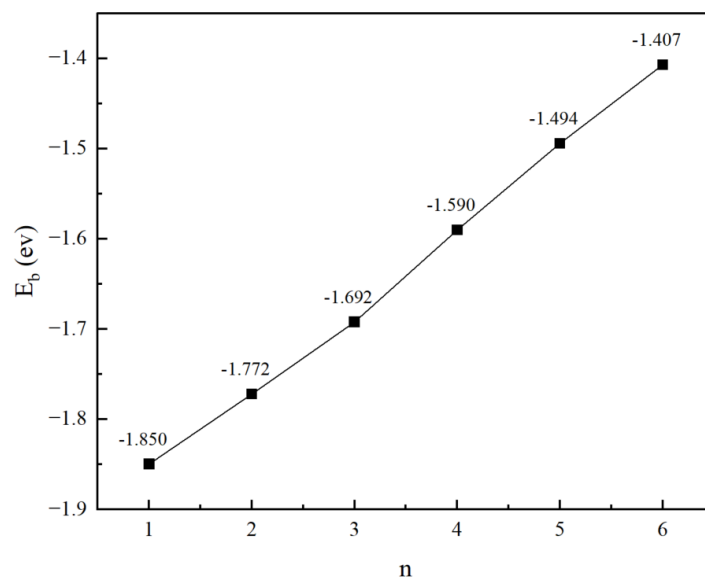**Figure S12.** The change of average binding energy of Cu<sub>6-n</sub>Ag<sub>n</sub> clusters with n.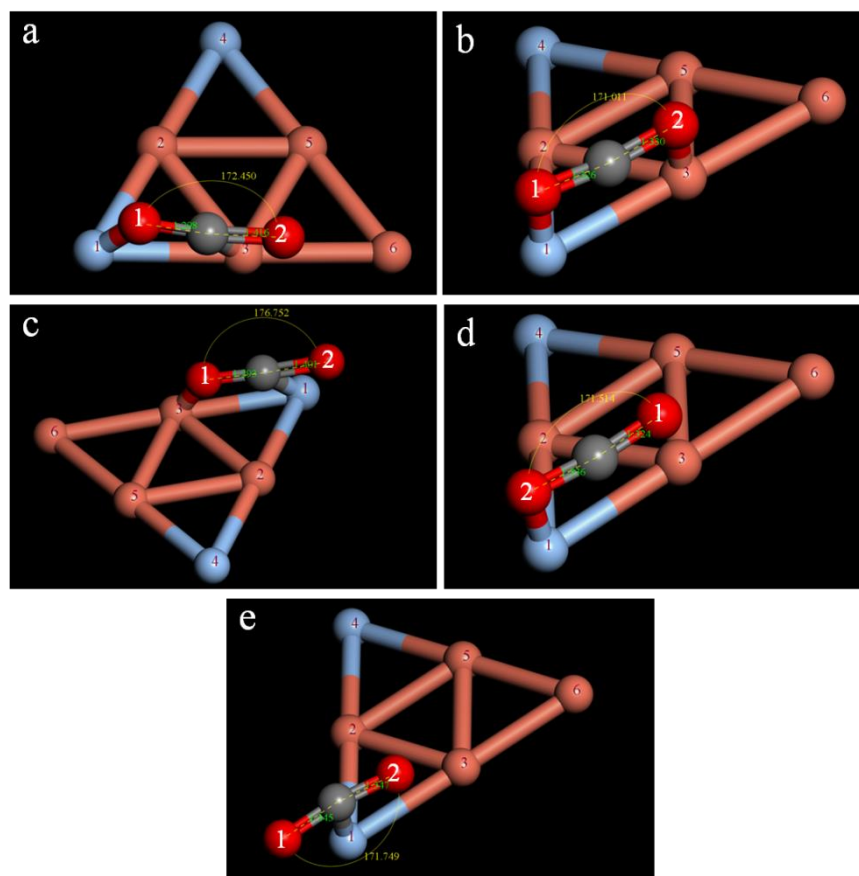**Figure S13.** The isomers of the Cu<sub>4</sub>Ag<sub>2</sub>-CO<sub>2</sub> adsorption structure.

**Table S11.** Bond length, bond angle and energy of Cu<sub>4</sub>Ag<sub>2</sub>-CO<sub>2</sub> structure.

| isomers | $\angle \text{O1CO2}/^\circ$ | $d_{\text{C-O1}}/\text{\AA}$ | $d_{\text{C-O2}}/\text{\AA}$ | $E_{\text{CuAg-CO2}}/\text{Ha}$ | $E_{\text{obs}}/\text{eV}$ |
|---------|------------------------------|------------------------------|------------------------------|---------------------------------|----------------------------|
| a       | 172.450°                     | 1.298                        | 1.416                        | -17149.166                      | -0.0698                    |
| b       | 171.011°                     | 1.326                        | 1.330                        | -17149.166                      | -0.079                     |
| c       | 176.752°                     | 1.293                        | 1.401                        | -17149.174                      | -0.288                     |
| d       | 171.514°                     | 1.324                        | 1.336                        | -17149.167                      | -0.096                     |
| e       | 171.749°                     | 1.345                        | 1.347                        | -17149.174                      | -0.287                     |

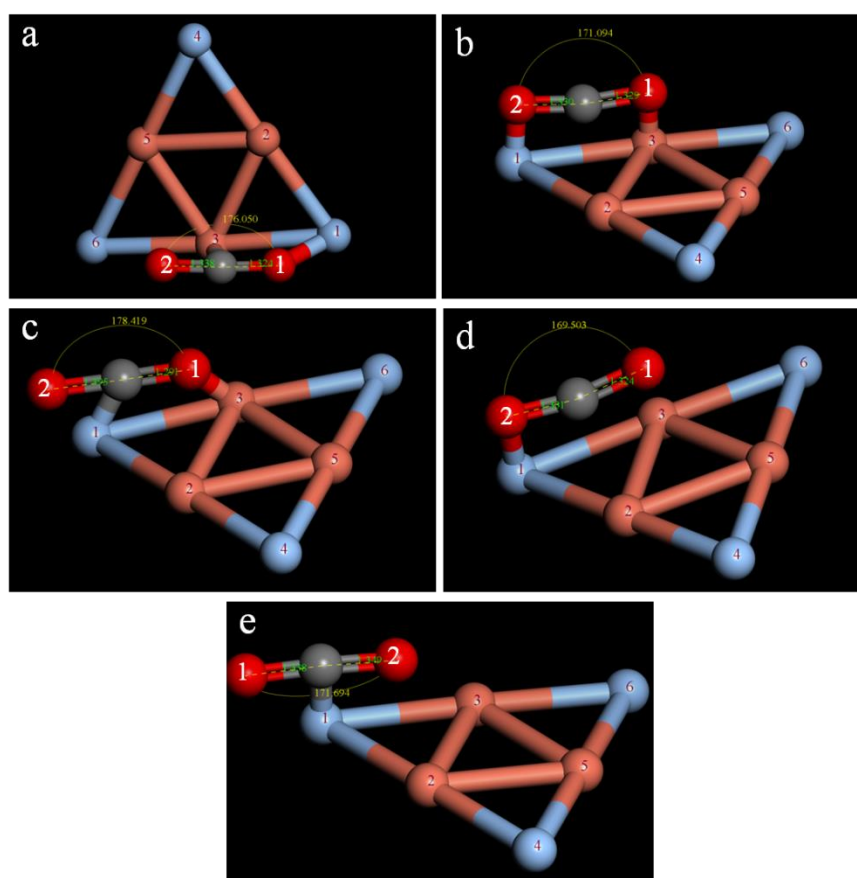**Figure S14.** The isomers of the Cu<sub>3</sub>Ag<sub>3</sub>-CO<sub>2</sub> adsorption structure.**Table S12.** Bond length, bond angle and energy of Cu<sub>3</sub>Ag<sub>3</sub>-CO<sub>2</sub> structure.

| isomers | $\angle \text{O1CO2}/^\circ$ | $d_{\text{C-O1}}/\text{\AA}$ | $d_{\text{C-O2}}/\text{\AA}$ | $E_{\text{CuAg-CO2}}/\text{Ha}$ | $E_{\text{obs}}/\text{eV}$ |
|---------|------------------------------|------------------------------|------------------------------|---------------------------------|----------------------------|
| a       | 176.050°                     | 1.324                        | 1.338                        | -20708.431                      | -0.140                     |
| b       | 171.094°                     | 1.329                        | 1.330                        | -20708.429                      | -0.058                     |
| c       | 178.419°                     | 1.291                        | 1.395                        | -20708.431                      | -0.123                     |
| d       | 169.503°                     | 1.324                        | 1.331                        | -20708.438                      | -0.324                     |
| e       | 171.694°                     | 1.338                        | 1.345                        | -20708.438                      | -0.328                     |



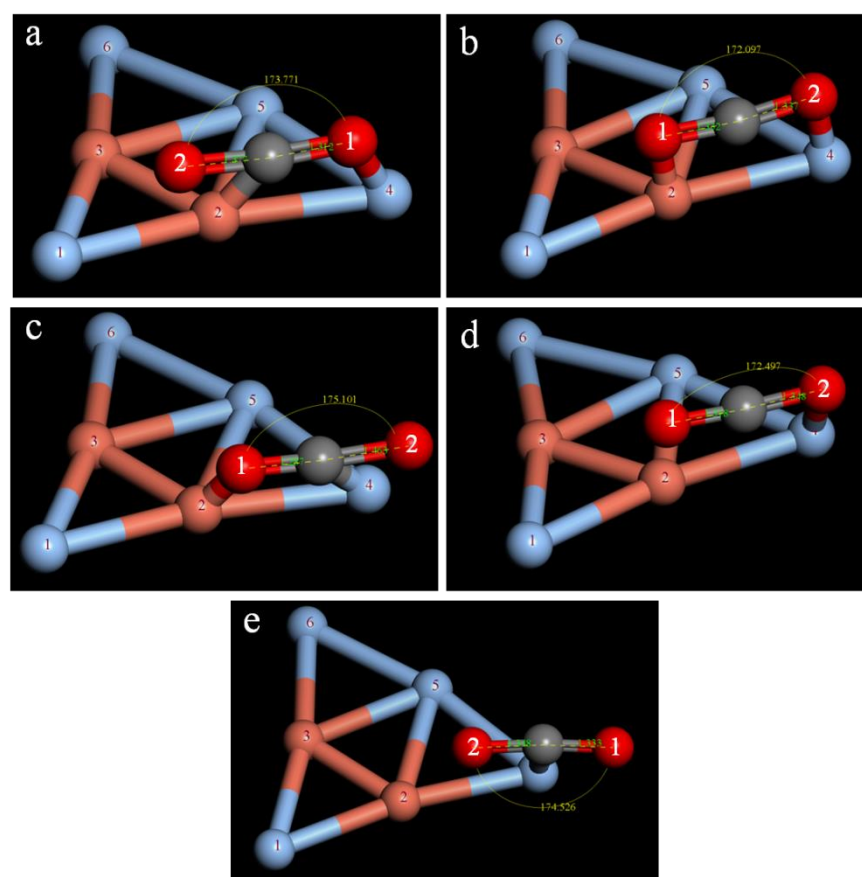

**Figure S15.** The isomers of the  $\text{Cu}_2\text{Ag}_4\text{-CO}_2$  adsorption structure.

**Table S13.** Bond length, bond angle and energy of  $\text{Cu}_2\text{Ag}_4\text{-CO}_2$  structure.

| isomers | $\angle \text{O1CO2}/^\circ$ | $d_{\text{C-O1}}/\text{\AA}$ | $d_{\text{C-O2}}/\text{\AA}$ | $E_{\text{CuAg-CO2}}/\text{Ha}$ | $E_{\text{obs}}/\text{eV}$ |
|---------|------------------------------|------------------------------|------------------------------|---------------------------------|----------------------------|
| a       | 173.771°                     | 1.312                        | 1.377                        | -24267.688                      | -0.085                     |
| b       | 172.097°                     | 1.332                        | 1.337                        | -24267.689                      | -0.122                     |
| c       | 171.101°                     | 1.287                        | 1.463                        | -24267.677                      | 0.208                      |
| d       | 172.497°                     | 1.318                        | 1.348                        | -24267.689                      | -0.113                     |
| e       | 174.526°                     | 1.333                        | 1.348                        | -24267.690                      | -0.151                     |

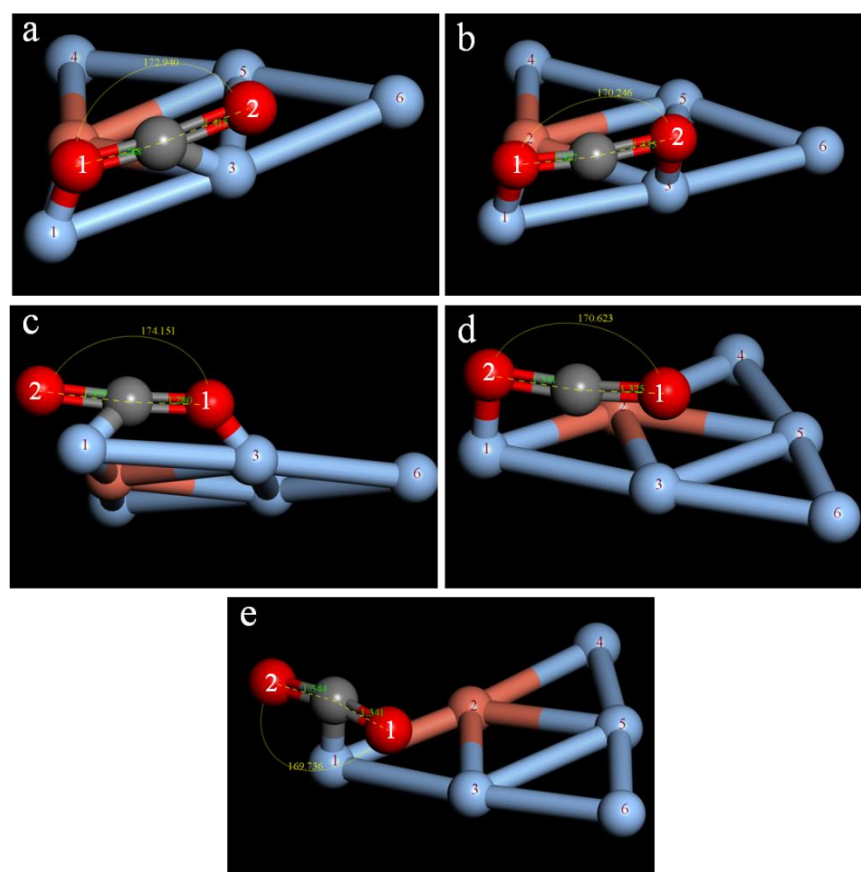

**Figure S16.** The isomers of the Cu<sub>1</sub>Ag<sub>5</sub>-CO<sub>2</sub> adsorption structure.

**Table S14.** Bond length, bond angle and energy of Cu<sub>1</sub>Ag<sub>5</sub>-CO<sub>2</sub> structure.

| isomers | $\angle \text{O1CO2}/^\circ$ | $d_{\text{C-O1}}/\text{\AA}$ | $d_{\text{C-O2}}/\text{\AA}$ | $E_{\text{CuAg-CO2}}/\text{Ha}$ | $E_{\text{obs}}/\text{eV}$ |
|---------|------------------------------|------------------------------|------------------------------|---------------------------------|----------------------------|
| a       | 172.940°                     | 1.288                        | 1.415                        | -27826.950                      | -0.164                     |
| b       | 170.246°                     | 1.327                        | 1.335                        | -27826.950                      | -0.159                     |
| c       | 174.151°                     | 1.280                        | 1.409                        | -27826.948                      | -0.106                     |
| d       | 170.623°                     | 1.325                        | 1.341                        | -27826.947                      | -0.032                     |
| e       | 169.736°                     | 1.341                        | 1.344                        | -27826.949                      | -0.127                     |

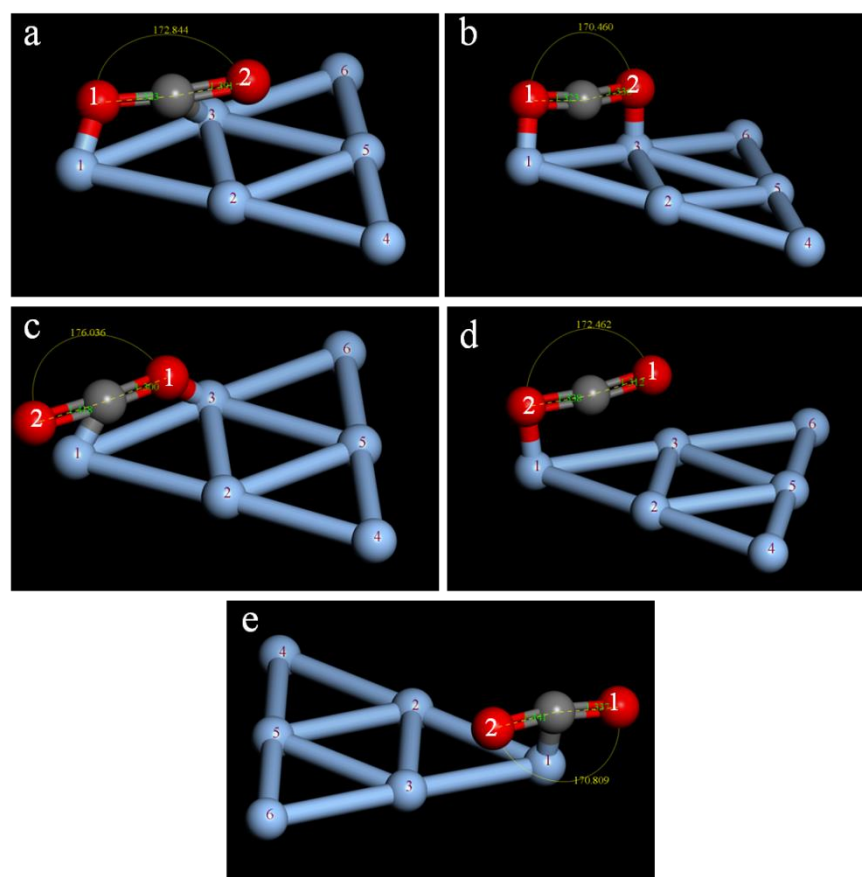

**Figure S17.** The isomers of the Ag<sub>6</sub>-CO<sub>2</sub> adsorption structure.

**Table S15.** Bond length, bond angle and energy of Ag<sub>6</sub>-CO<sub>2</sub> structure.

| isomers | $\angle \text{O1CO2}/^\circ$ | $d_{\text{C-O1}}/\text{\AA}$ | $d_{\text{C-O2}}/\text{\AA}$ | $E_{\text{CuAg-CO2}}/\text{Ha}$ | $E_{\text{obs}}/\text{eV}$ |
|---------|------------------------------|------------------------------|------------------------------|---------------------------------|----------------------------|
| a       | 172.844°                     | 1.323                        | 1.391                        | -31386.212                      | -0.174                     |
| b       | 170.460°                     | 1.320                        | 1.333                        | -31386.211                      | -0.156                     |
| c       | 176.036°                     | 1.300                        | 1.418                        | -31386.211                      | -0.153                     |
| d       | 172.462°                     | 1.312                        | 1.338                        | -31386.212                      | -0.161                     |
| e       | 170.809°                     | 1.337                        | 1.341                        | -31386.211                      | -0.146                     |

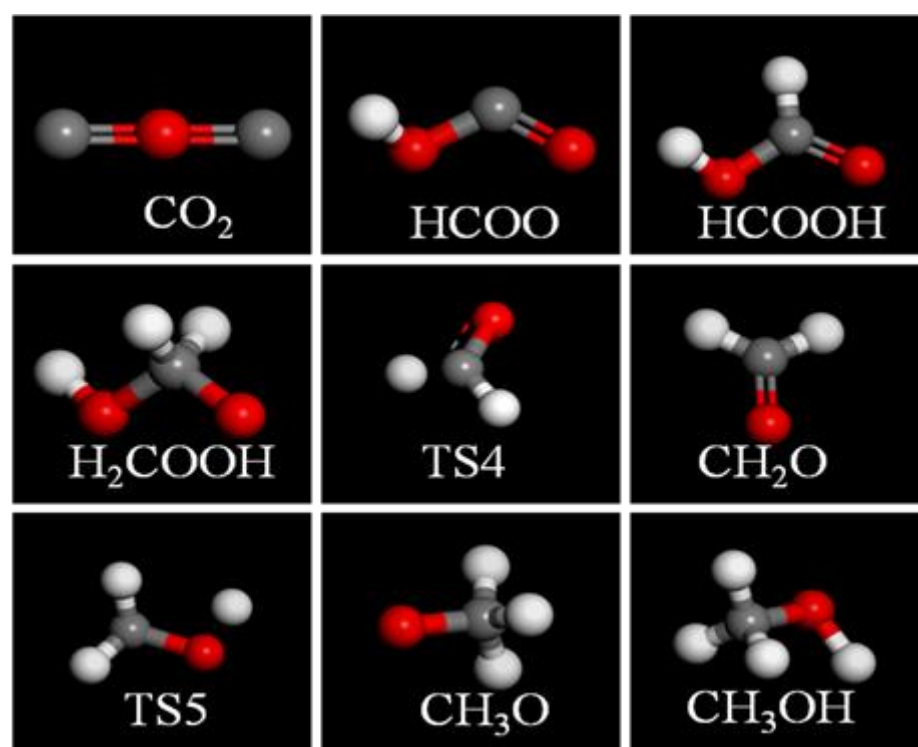

**Figure S18.** The optimized configuration of the monomer structure in the  $\text{CO}_2$  to  $\text{CH}_3\text{OH}$  route.

**Table S16.** Gibbs free energy table of monomers for the hydrogenation of  $\text{CO}_2$  to  $\text{CH}_3\text{OH}$ .

| intermediate                                               | $\Delta G/\text{eV}$ |
|------------------------------------------------------------|----------------------|
| $\text{CO}_2^* + 6\text{H}^*$                              | 0                    |
| $\text{HCOO}^* + 5\text{H}^*$                              | 177.037              |
| $\text{HCOOH}^* + 4\text{H}^*$                             | 218.916              |
| $\text{H}_2\text{COOH}^* + 3\text{H}^*$                    | 244.005              |
| $\text{TS4} + \text{H}_2\text{O} + 2\text{H}^*$            | 154.506              |
| $\text{CH}_2\text{O}^* + \text{H}_2\text{O} + 2\text{H}^*$ | 266.481              |
| $\text{TS5} + \text{H}_2\text{O} + \text{H}^*$             | 275.869              |
| $\text{CH}_3\text{O}^* + \text{H}_2\text{O} + \text{H}^*$  | 353.449              |
| $\text{CH}_3\text{OH} + \text{H}_2\text{O}$                | 389.422              |

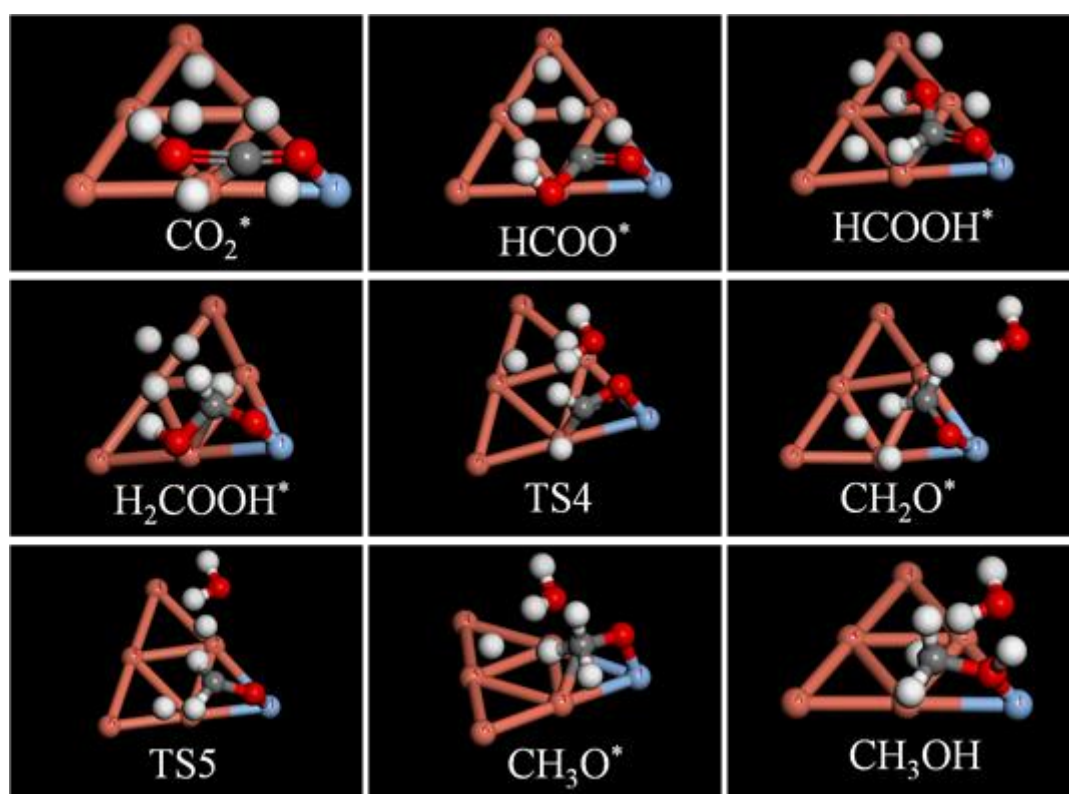

Figure S19. The path monomer adsorbed on Cu<sub>5</sub>Ag<sub>1</sub> cluster.

Table S17. Gibbs free energy table of Cu<sub>5</sub>Ag<sub>1</sub> clusters catalyzed by CO<sub>2</sub> hydrogenation to CH<sub>3</sub>OH monomer.

| intermediate                            | $\Delta G/\text{eV}$ |
|-----------------------------------------|----------------------|
| CO <sub>2</sub> *+6H*                   | 0                    |
| HCOO*+5H*                               | -115.567             |
| HCOOH*+4H*                              | -23.783              |
| H <sub>2</sub> COOH*+3H*                | 168.928              |
| TS4+H <sub>2</sub> O+2H*                | 56.573               |
| CH <sub>2</sub> O*+H <sub>2</sub> O+2H* | -88.546              |
| TS5+H <sub>2</sub> O+H*                 | -31.103              |
| CH <sub>3</sub> O*+H <sub>2</sub> O+H*  | 73.580               |
| CH <sub>3</sub> OH+H <sub>2</sub> O     | 84.709               |

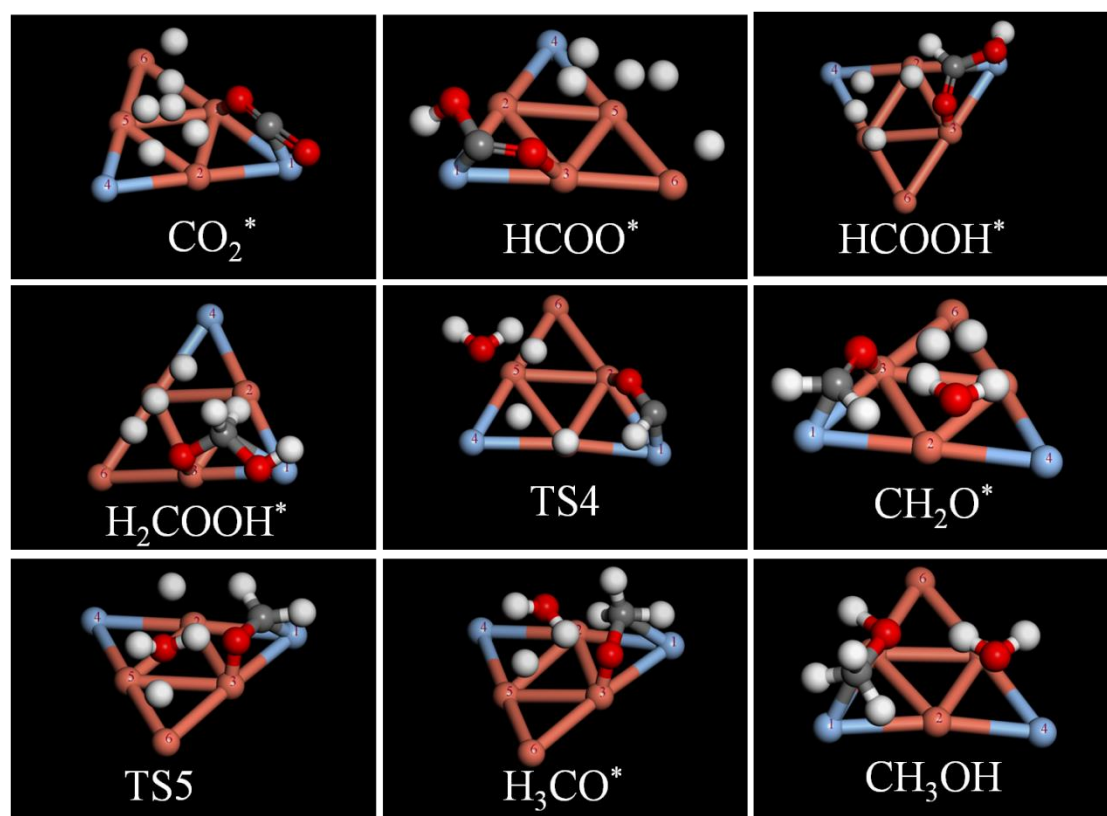

**Figure S20.** The path monomer adsorbed on Cu<sub>4</sub>Ag<sub>2</sub> cluster.

**Table S18.** Gibbs free energy table of Cu<sub>4</sub>Ag<sub>2</sub> clusters catalyzed by CO<sub>2</sub> hydrogenation to CH<sub>3</sub>OH monomer.

| intermediate                            | $\Delta G/\text{eV}$ |
|-----------------------------------------|----------------------|
| CO <sub>2</sub> *+6H*                   | 0                    |
| HCOO*+5H*                               | -236.277             |
| HCOOH*+4H*                              | 209.065              |
| H <sub>2</sub> COOH*+3H*                | 152.493              |
| TS4+H <sub>2</sub> O+2H*                | -169.364             |
| CH <sub>2</sub> O*+H <sub>2</sub> O+2H* | 205.854              |
| TS5+H <sub>2</sub> O+H*                 | 194.099              |
| CH <sub>3</sub> O*+H <sub>2</sub> O+H*  | 324.822              |
| CH <sub>3</sub> OH+H <sub>2</sub> O     | 129.553              |

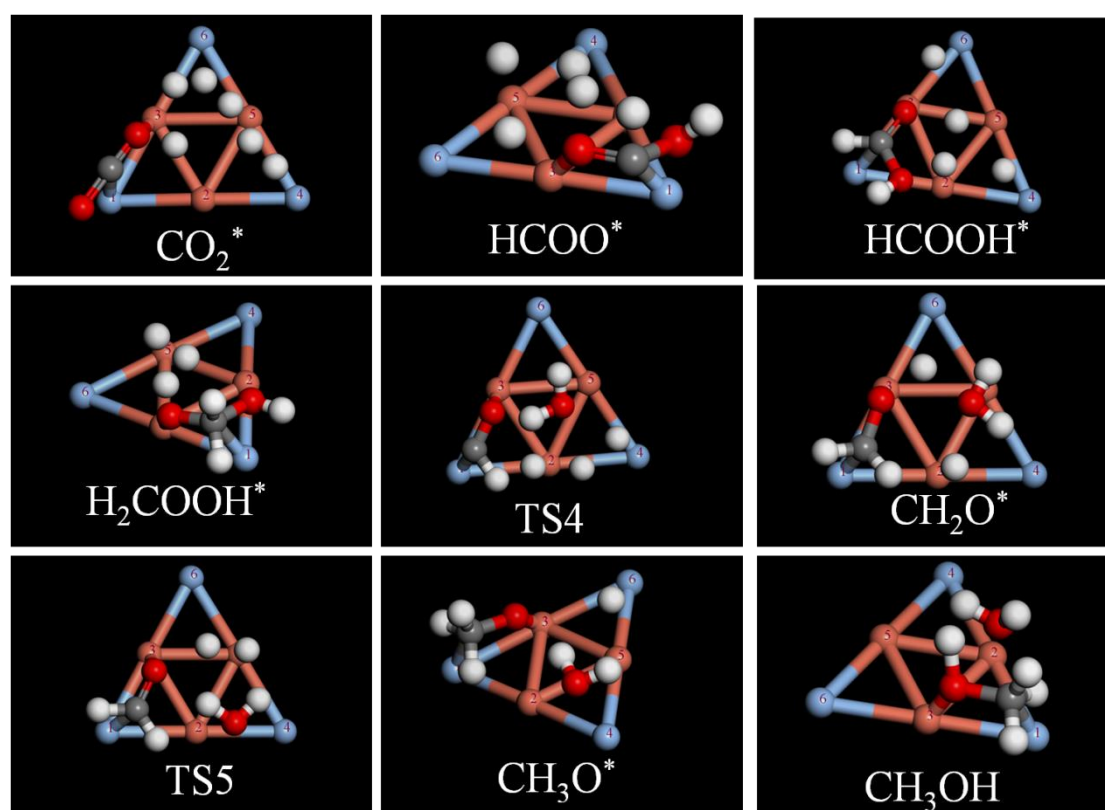

Figure S21. The path monomer adsorbed on Cu<sub>3</sub>Ag<sub>3</sub> cluster.

Table S19. Gibbs free energy table of Cu<sub>3</sub>Ag<sub>3</sub> clusters catalyzed by CO<sub>2</sub> hydrogenation to CH<sub>3</sub>OH monomer.

| intermediate                                                     | $\Delta G/\text{eV}$ |
|------------------------------------------------------------------|----------------------|
| CO <sub>2</sub> <sup>*</sup> +6H <sup>*</sup>                    | 0                    |
| HCOO <sup>*</sup> +5H <sup>*</sup>                               | 45.280               |
| HCOOH <sup>*</sup> +4H <sup>*</sup>                              | 198.834              |
| H <sub>2</sub> COOH <sup>*</sup> +3H <sup>*</sup>                | 97.607               |
| TS4+H <sub>2</sub> O+2H <sup>*</sup>                             | 177.282              |
| CH <sub>2</sub> O <sup>*</sup> +H <sub>2</sub> O+2H <sup>*</sup> | 183.813              |
| TS5+H <sub>2</sub> O+H <sup>*</sup>                              | 208.657              |
| CH <sub>3</sub> O <sup>*</sup> +H <sub>2</sub> O+H <sup>*</sup>  | 122.342              |
| CH <sub>3</sub> OH+H <sub>2</sub> O                              | 236.630              |



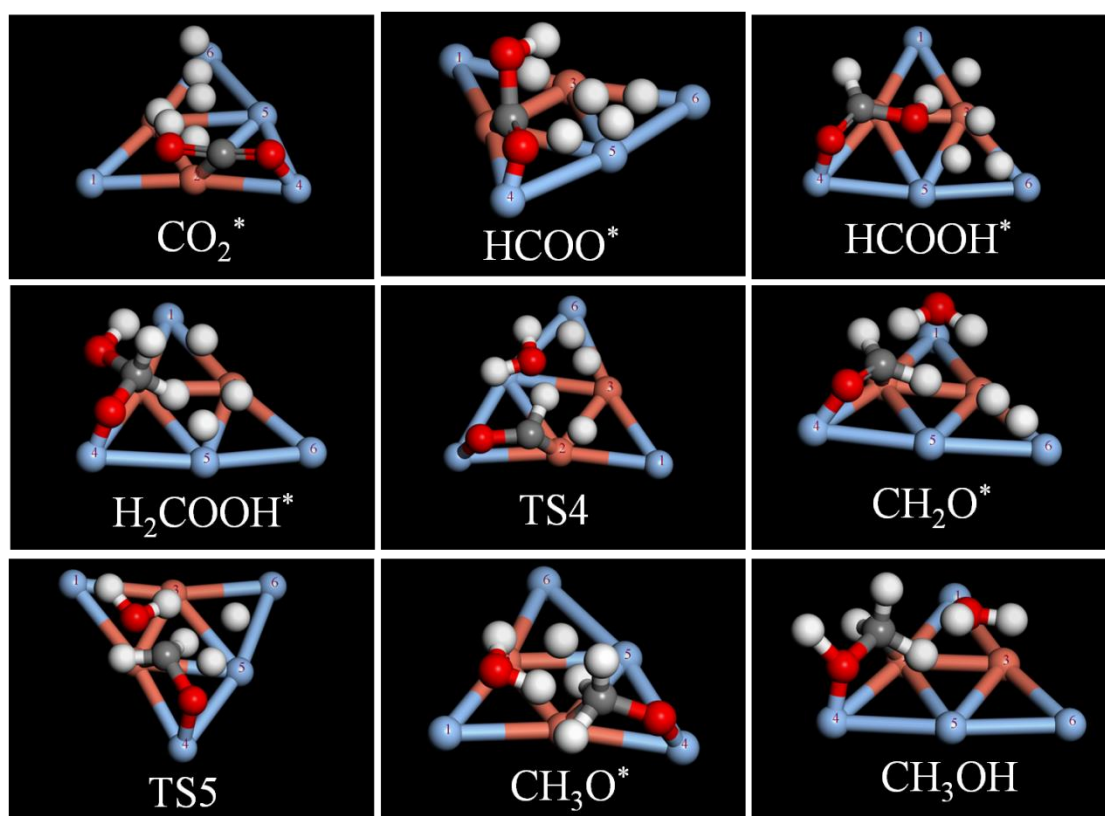

**Figure S22.** The path monomer adsorbed on Cu<sub>2</sub>Ag<sub>4</sub> cluster.

**Table S20.** Gibbs free energy table of Cu<sub>2</sub>Ag<sub>4</sub> clusters catalyzed by CO<sub>2</sub> hydrogenation to CH<sub>3</sub>OH monomer.

| intermediate                                                     | $\Delta G/\text{eV}$ |
|------------------------------------------------------------------|----------------------|
| CO <sub>2</sub> <sup>*</sup> +6H <sup>*</sup>                    | 0                    |
| HCOO <sup>*</sup> +5H <sup>*</sup>                               | -433.097             |
| HCOOH <sup>*</sup> +4H <sup>*</sup>                              | -549.779             |
| H <sub>2</sub> COOH <sup>*</sup> +3H <sup>*</sup>                | -618.951             |
| TS4+H <sub>2</sub> O+2H <sup>*</sup>                             | -603.358             |
| CH <sub>2</sub> O <sup>*</sup> +H <sub>2</sub> O+2H <sup>*</sup> | -525.262             |
| TS5+H <sub>2</sub> O+H <sup>*</sup>                              | -629.318             |
| CH <sub>3</sub> O <sup>*</sup> +H <sub>2</sub> O+H <sup>*</sup>  | -457.777             |
| CH <sub>3</sub> OH+H <sub>2</sub> O                              | -501.452             |



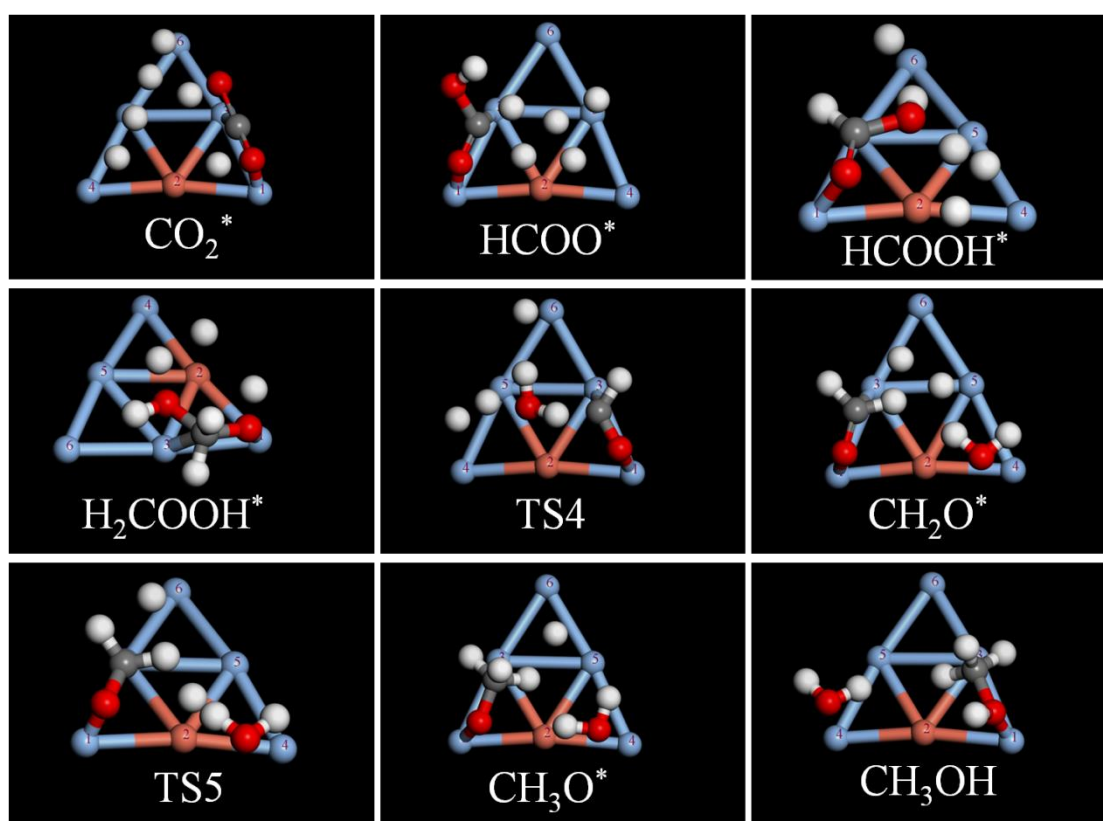

**Figure S23.** The path monomer adsorbed on Cu<sub>1</sub>Ag<sub>5</sub> cluster.

**Table S21.** Gibbs free energy table of Cu<sub>1</sub>Ag<sub>5</sub> clusters catalyzed by CO<sub>2</sub> hydrogenation to CH<sub>3</sub>OH monomer.

| intermediate                            | $\Delta G/\text{eV}$ |
|-----------------------------------------|----------------------|
| CO <sub>2</sub> *+6H*                   | 0                    |
| HCOO*+5H*                               | -173.690             |
| HCOOH*+4H*                              | -332.034             |
| H <sub>2</sub> COOH*+3H*                | -144.901             |
| TS4+H <sub>2</sub> O+2H*                | -73.743              |
| CH <sub>2</sub> O*+H <sub>2</sub> O+2H* | -106.369             |
| TS5+H <sub>2</sub> O+H*                 | 116.247              |
| CH <sub>3</sub> O*+H <sub>2</sub> O+H*  | -11.783              |
| CH <sub>3</sub> OH+H <sub>2</sub> O     | 23.456               |

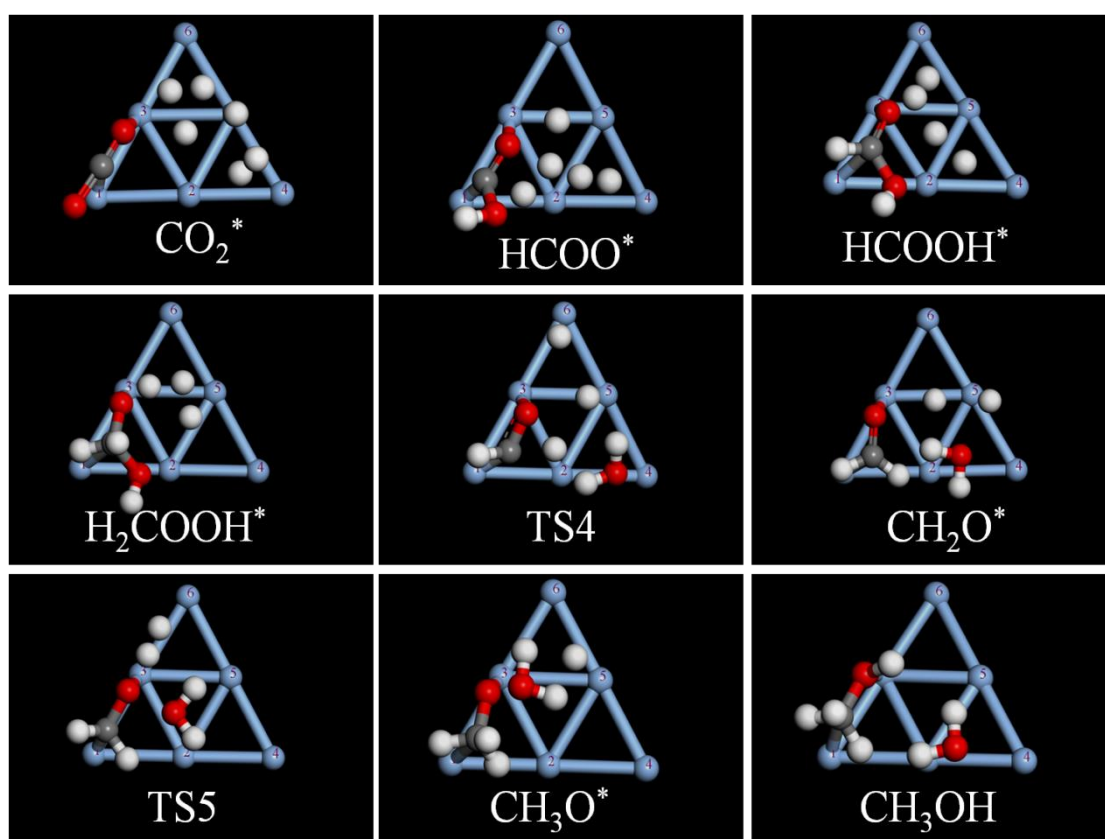

**Figure S24.** The path monomer adsorbed on Ag<sub>6</sub> cluster.

**Table S22.** Gibbs free energy table of Ag<sub>6</sub> clusters catalyzed by CO<sub>2</sub> hydrogenation to CH<sub>3</sub>OH monomer.

| intermediate                            | $\Delta G/\text{eV}$ |
|-----------------------------------------|----------------------|
| CO <sub>2</sub> *+6H*                   | 0                    |
| HCOO*+5H*                               | 390.348              |
| HCOOH*+4H*                              | 326.754              |
| H <sub>2</sub> COOH*+3H*                | 483.873              |
| TS4+H <sub>2</sub> O+2H*                | 537.017              |
| CH <sub>2</sub> O*+H <sub>2</sub> O+2H* | 591.712              |
| TS5+H <sub>2</sub> O+H*                 | 528.962              |
| CH <sub>3</sub> O*+H <sub>2</sub> O+H*  | 510.132              |
| CH <sub>3</sub> OH+H <sub>2</sub> O     | 482.893              |

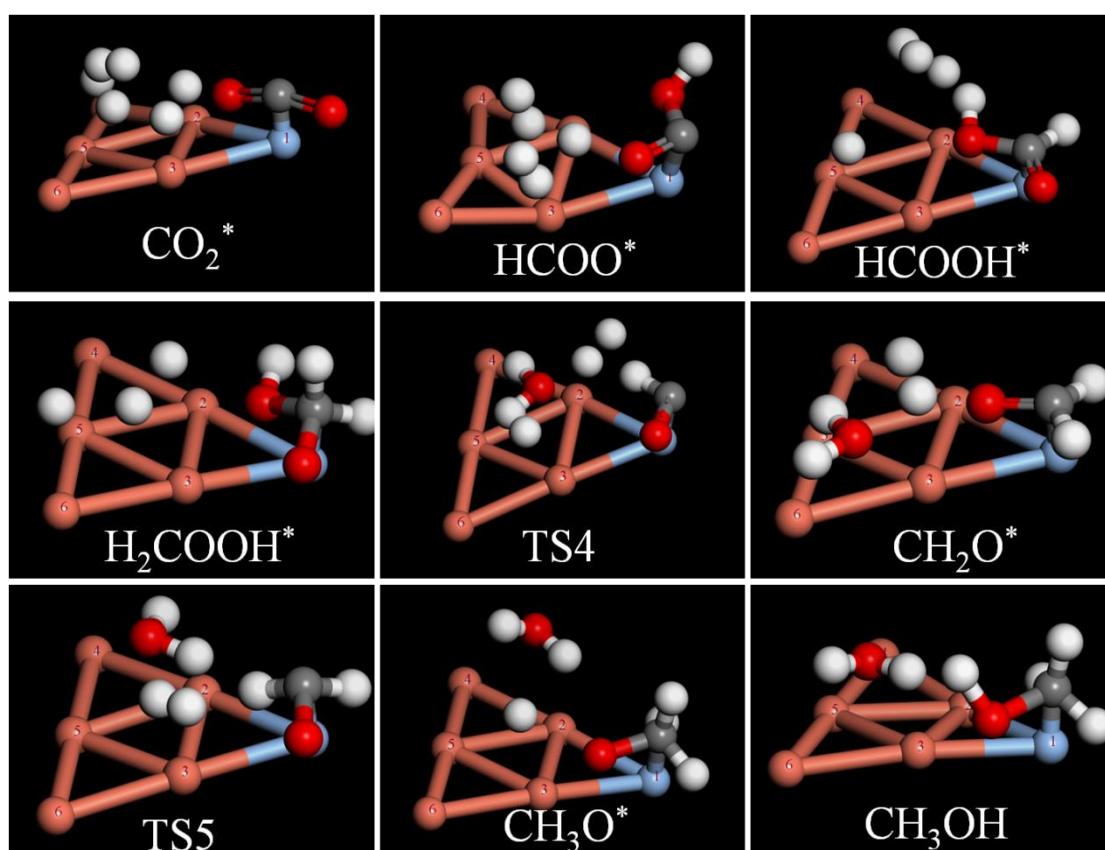

**Figure S25.** The path monomer adsorbed on Cu<sub>5</sub>Ag<sub>1</sub> cluster.

**Table S23.** Gibbs free energy table of Cu<sub>5</sub>Ag<sub>1</sub> clusters catalyzed by CO<sub>2</sub> hydrogenation to CH<sub>3</sub>OH monomer.

| intermediate                            | $\Delta G/\text{eV}$ |
|-----------------------------------------|----------------------|
| CO <sub>2</sub> *+6H*                   | 0                    |
| HCOO*+5H*                               | -187.922             |
| HCOOH*+4H*                              | -118.152             |
| H <sub>2</sub> COOH*+3H*                | 134.016              |
| TS4+H <sub>2</sub> O+2H*                | -146.860             |
| CH <sub>2</sub> O*+H <sub>2</sub> O+2H* | 75.240               |
| TS5+H <sub>2</sub> O+H*                 | 123.948              |
| CH <sub>3</sub> O*+H <sub>2</sub> O+H*  | 140.438              |
| CH <sub>3</sub> OH+H <sub>2</sub> O     | 194.262              |

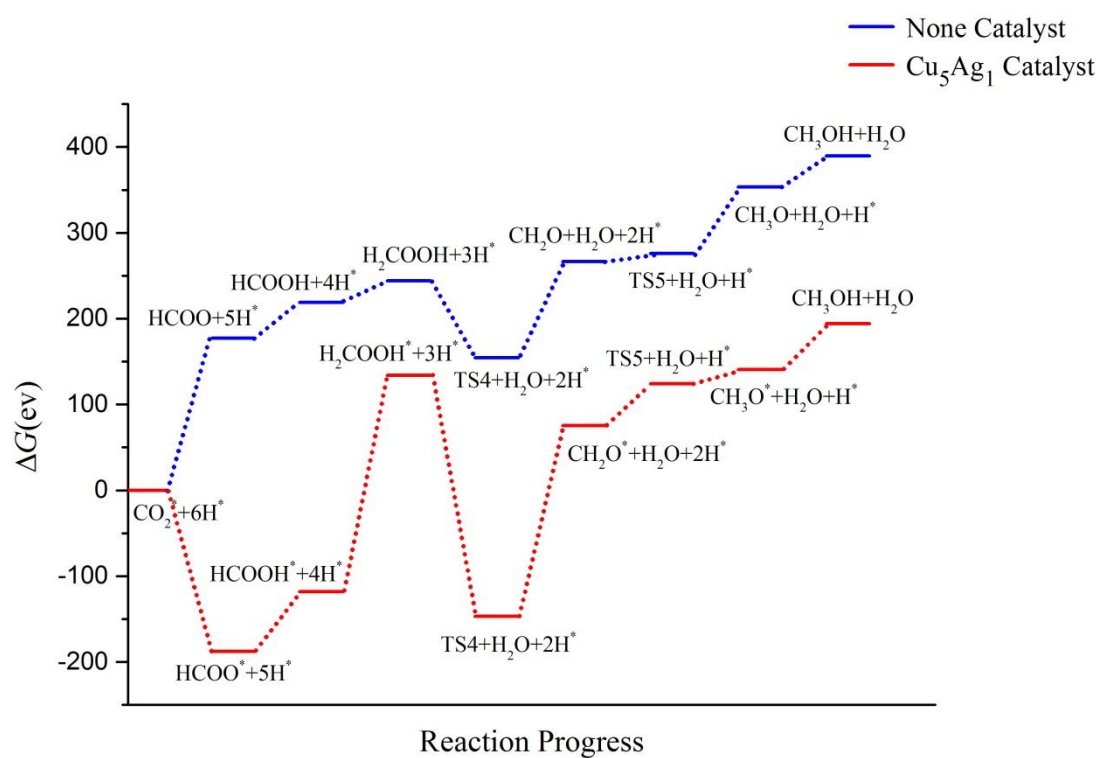

**Figure S26.** The path diagram of  $\text{CO}_2$  hydrogenation reduction to  $\text{CH}_3\text{OH}$  catalyzed by  $\text{Cu}_5\text{Ag}_1$  cluster.

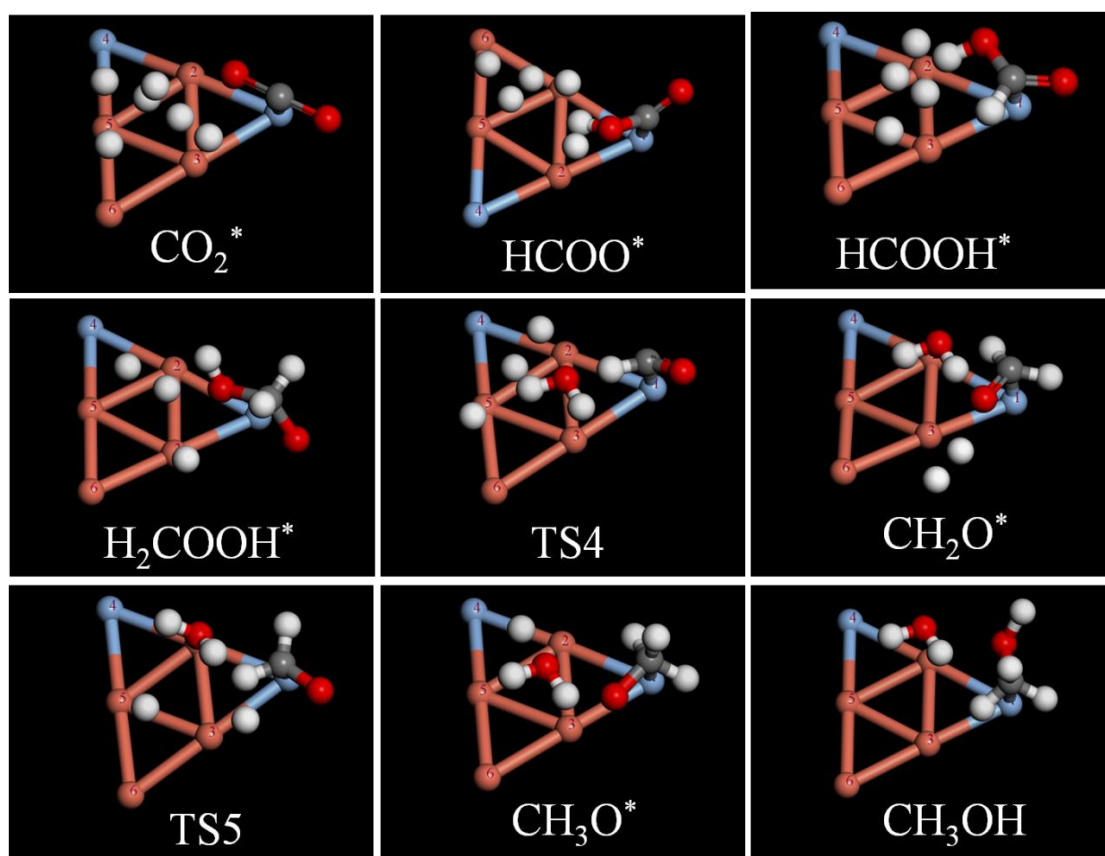

Figure S27. The path monomer adsorbed on Cu<sub>4</sub>Ag<sub>2</sub> cluster.

Table S24. Gibbs free energy table of Cu<sub>4</sub>Ag<sub>2</sub> clusters catalyzed by CO<sub>2</sub> hydrogenation to CH<sub>3</sub>OH monomer.

| intermediate                            | $\Delta G/\text{eV}$ |
|-----------------------------------------|----------------------|
| CO <sub>2</sub> *+6H*                   | 0                    |
| HCOO*+5H*                               | -147.703             |
| HCOOH*+4H*                              | 28.164               |
| H <sub>2</sub> COOH*+3H*                | 207.759              |
| TS4+H <sub>2</sub> O+2H*                | 102.260              |
| CH <sub>2</sub> O*+H <sub>2</sub> O+2H* | 84.355               |
| TS5+H <sub>2</sub> O+H*                 | 287.706              |
| CH <sub>3</sub> O*+H <sub>2</sub> O+H*  | 331.952              |
| CH <sub>3</sub> OH+H <sub>2</sub> O     | 266.617              |

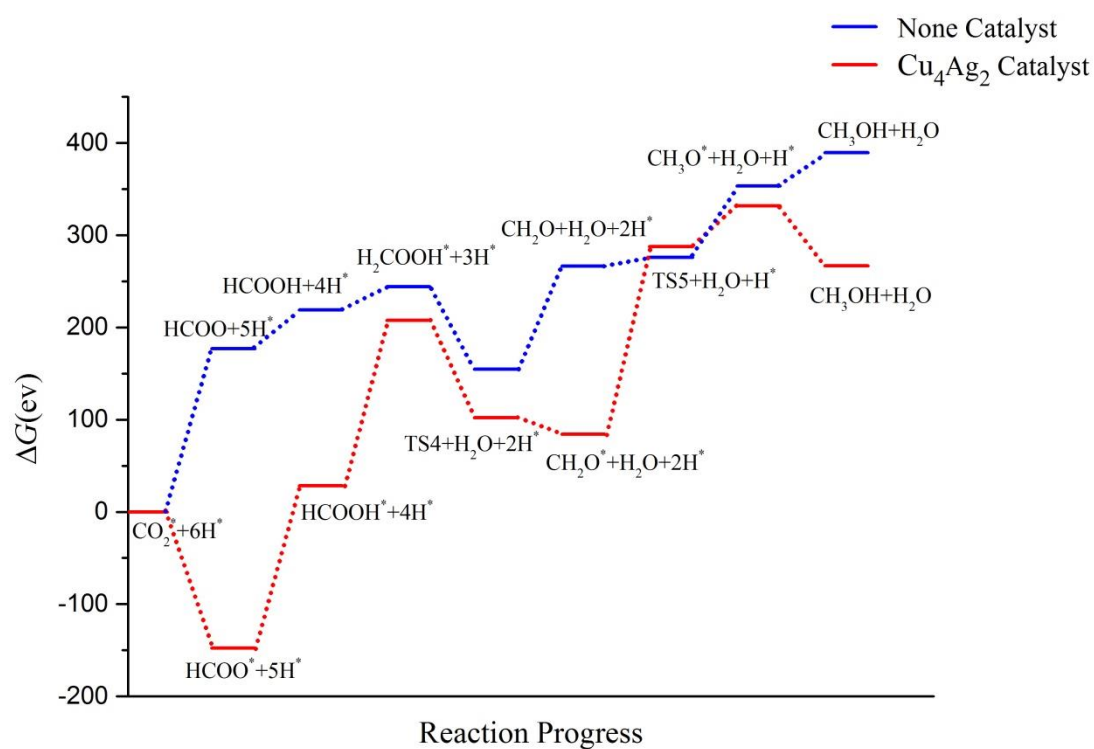

**Figure S28.** The path diagram of  $\text{CO}_2$  hydrogenation reduction to  $\text{CH}_3\text{OH}$  catalyzed by  $\text{Cu}_4\text{Ag}_2$  cluster.

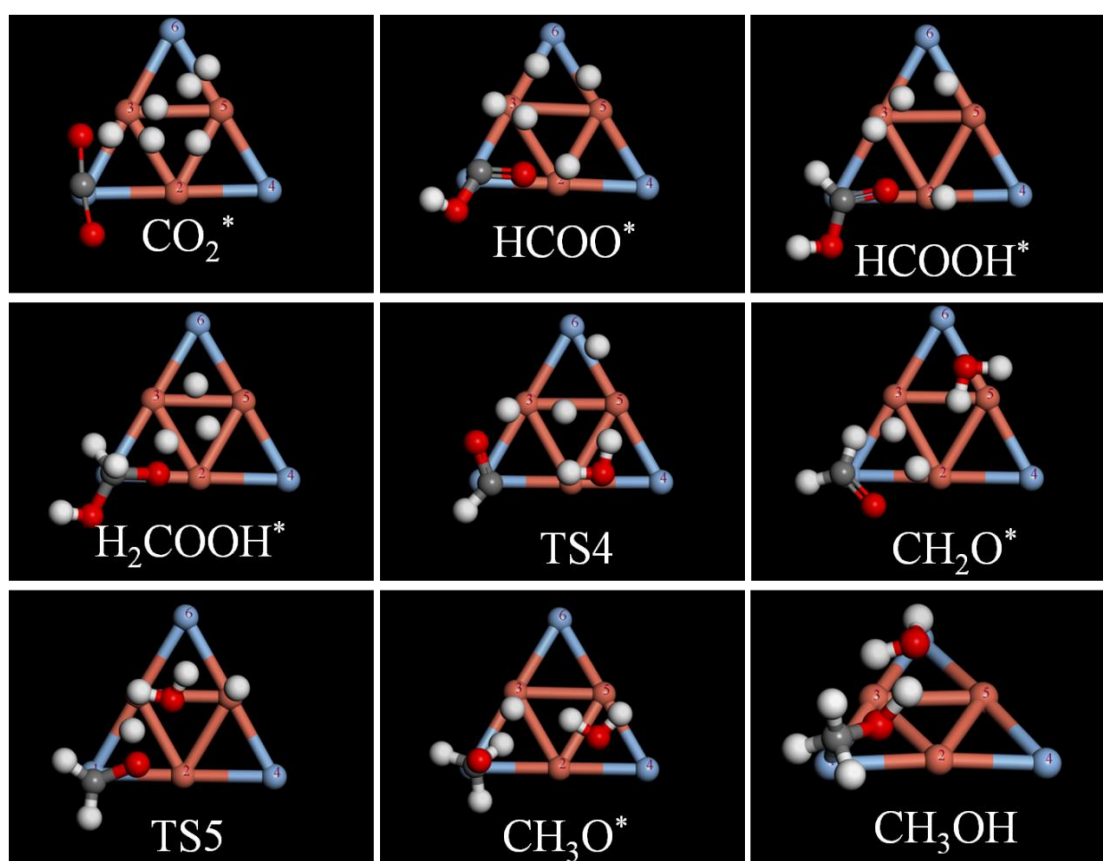

**Figure S29.** The path monomer adsorbed on Cu<sub>3</sub>Ag<sub>3</sub> cluster.

**Table S25.** Gibbs free energy table of Cu<sub>3</sub>Ag<sub>3</sub> clusters catalyzed by CO<sub>2</sub> hydrogenation to CH<sub>3</sub>OH monomer.

| intermediate                            | $\Delta G/\text{eV}$ |
|-----------------------------------------|----------------------|
| CO <sub>2</sub> *+6H*                   | 0                    |
| HCOO*+5H*                               | -79.430              |
| HCOOH*+4H*                              | -286.019             |
| H <sub>2</sub> COOH*+3H*                | -5.116               |
| TS4+H <sub>2</sub> O+2H*                | -184.983             |
| CH <sub>2</sub> O*+H <sub>2</sub> O+2H* | -41.661              |
| TS5+H <sub>2</sub> O+H*                 | 129.281              |
| CH <sub>3</sub> O*+H <sub>2</sub> O+H*  | -40.463              |
| CH <sub>3</sub> OH+H <sub>2</sub> O     | 242.399              |

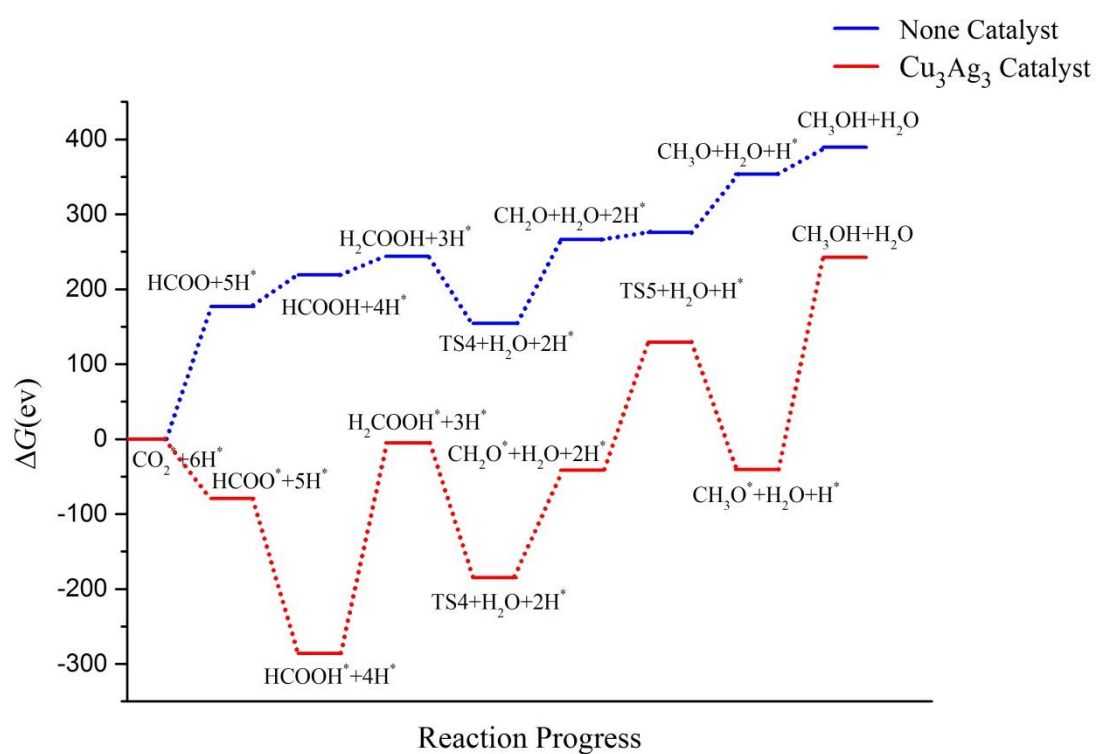

**Figure S30.** The path diagram of  $\text{CO}_2$  hydrogenation reduction to  $\text{CH}_3\text{OH}$  catalyzed by  $\text{Cu}_3\text{Ag}_3$  cluster.



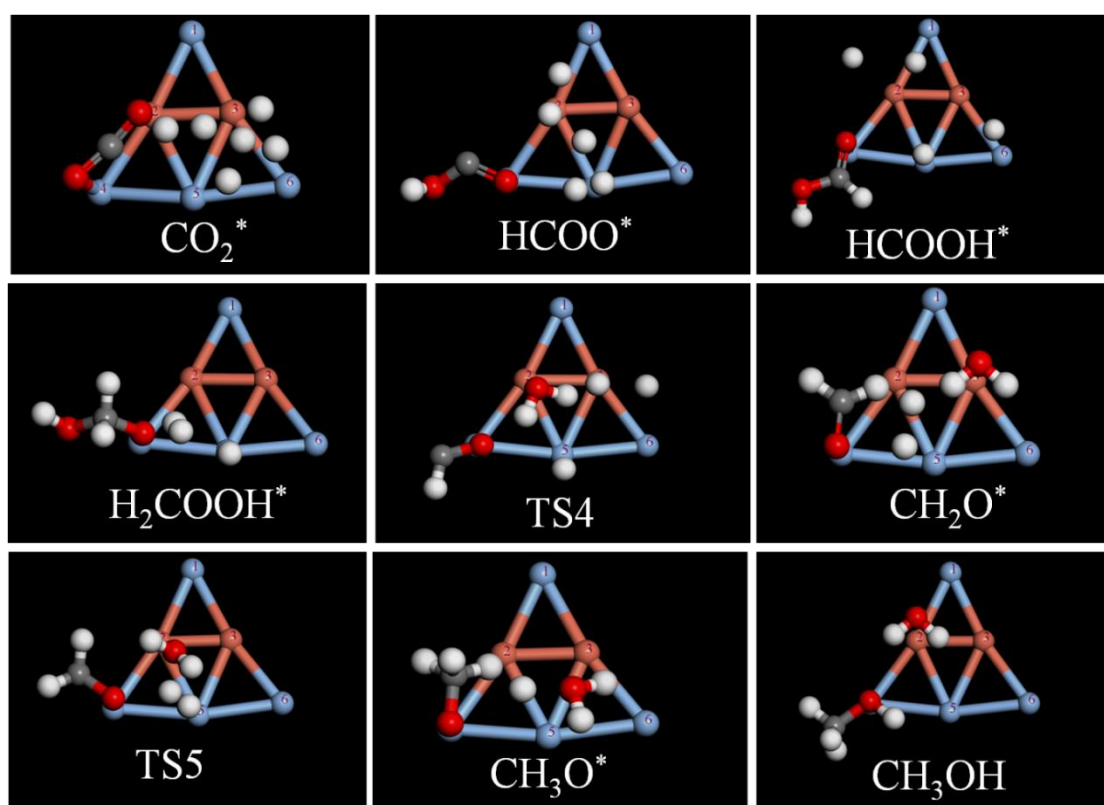

**Figure S31.** The path monomer adsorbed on Cu<sub>2</sub>Ag<sub>4</sub> cluster.

**Table S26.** Gibbs free energy table of Cu<sub>2</sub>Ag<sub>4</sub> clusters catalyzed by CO<sub>2</sub> hydrogenation to CH<sub>3</sub>OH monomer.

| intermediate                            | $\Delta G/\text{eV}$ |
|-----------------------------------------|----------------------|
| CO <sub>2</sub> *+6H*                   | 0                    |
| HCOO*+5H*                               | -370.048             |
| HCOOH*+4H*                              | -91.321              |
| H <sub>2</sub> COOH*+3H*                | 72.273               |
| TS4+H <sub>2</sub> O+2H*                | -43.429              |
| CH <sub>2</sub> O*+H <sub>2</sub> O+2H* | -24.844              |
| TS5+H <sub>2</sub> O+H*                 | 140.329              |
| CH <sub>3</sub> O*+H <sub>2</sub> O+H*  | 59.130               |
| CH <sub>3</sub> OH+H <sub>2</sub> O     | 7.347                |

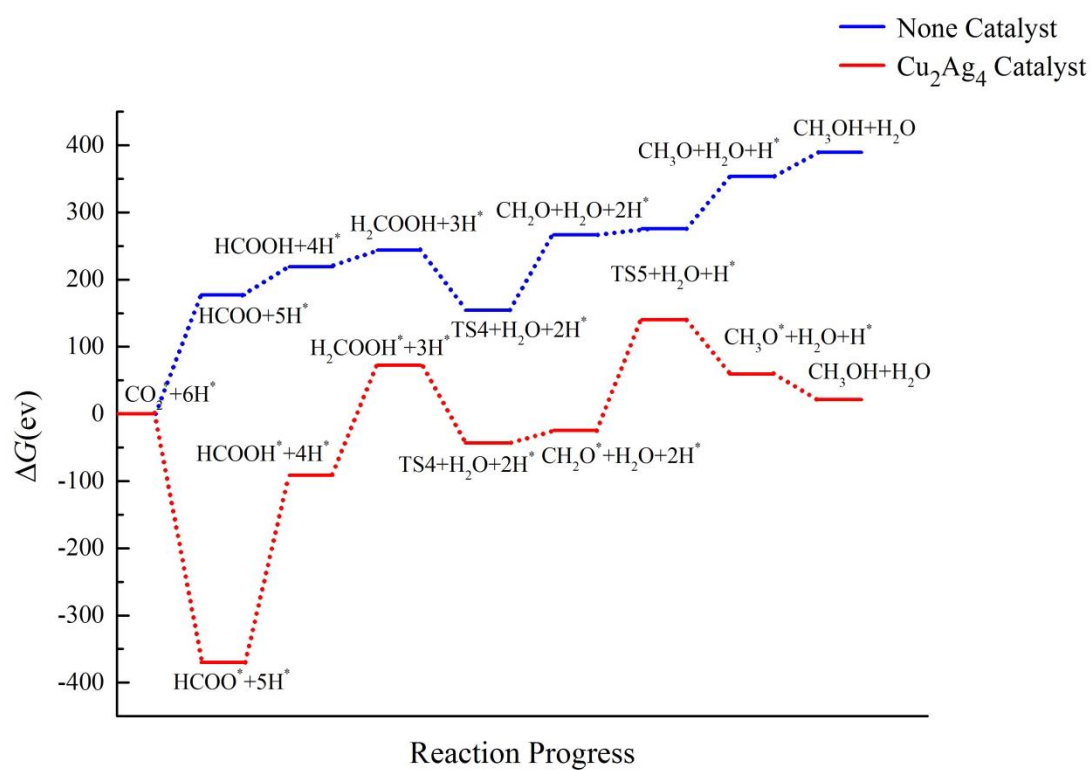

**Figure S32.** The path diagram of  $\text{CO}_2$  hydrogenation reduction to  $\text{CH}_3\text{OH}$  catalyzed by  $\text{Cu}_2\text{Ag}_4$  cluster.

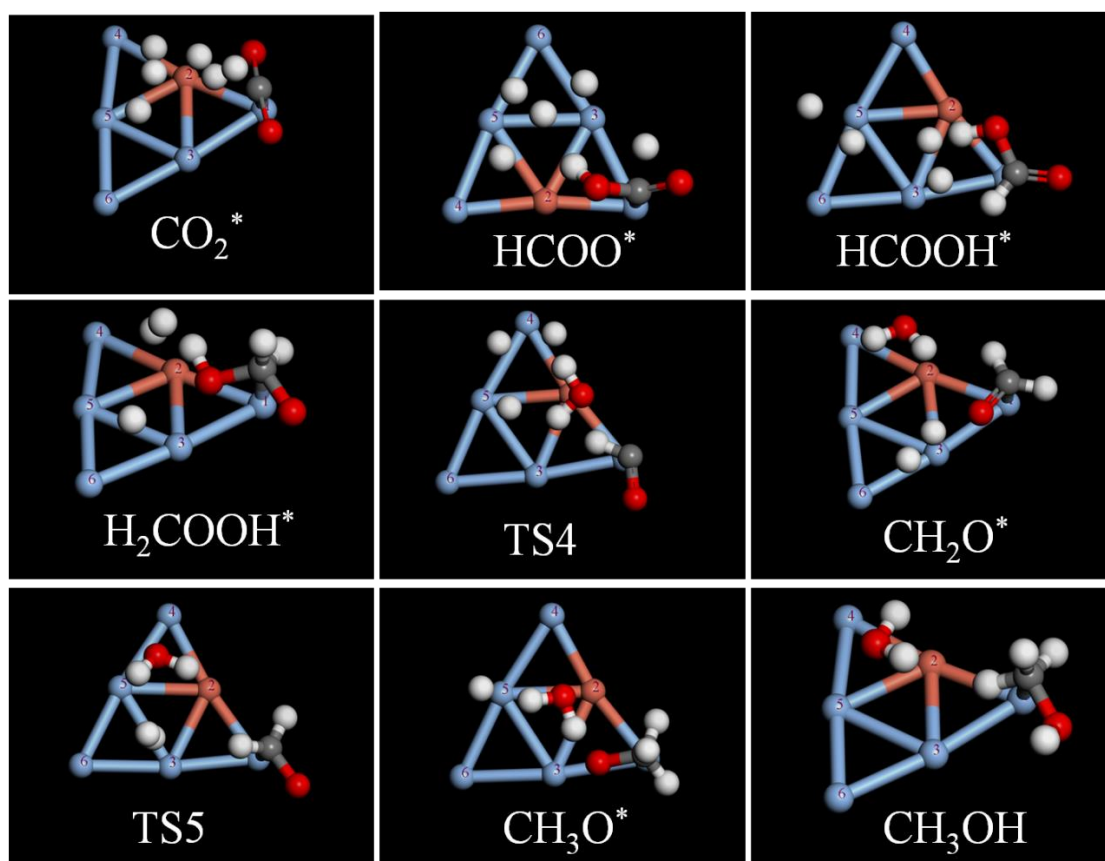

**Figure S33.** The path monomer adsorbed on Cu<sub>1</sub>Ag<sub>5</sub> cluster.

**Table S27.** Gibbs free energy table of Cu<sub>1</sub>Ag<sub>5</sub> clusters catalyzed by CO<sub>2</sub> hydrogenation to CH<sub>3</sub>OH monomer.

| intermediate                                                     | $\Delta G/\text{eV}$ |
|------------------------------------------------------------------|----------------------|
| CO <sub>2</sub> <sup>*</sup> +6H <sup>*</sup>                    | 0                    |
| HCOO <sup>*</sup> +5H <sup>*</sup>                               | -272.577             |
| HCOOH <sup>*</sup> +4H <sup>*</sup>                              | 61.879               |
| H <sub>2</sub> COOH <sup>*</sup> +3H <sup>*</sup>                | 94.750               |
| TS4+H <sub>2</sub> O+2H <sup>*</sup>                             | 38.695               |
| CH <sub>2</sub> O <sup>*</sup> +H <sub>2</sub> O+2H <sup>*</sup> | 67.131               |
| TS5+H <sub>2</sub> O+H <sup>*</sup>                              | 177.146              |
| CH <sub>3</sub> O <sup>*</sup> +H <sub>2</sub> O+H <sup>*</sup>  | 127.349              |
| CH <sub>3</sub> OH+H <sub>2</sub> O                              | 177.718              |

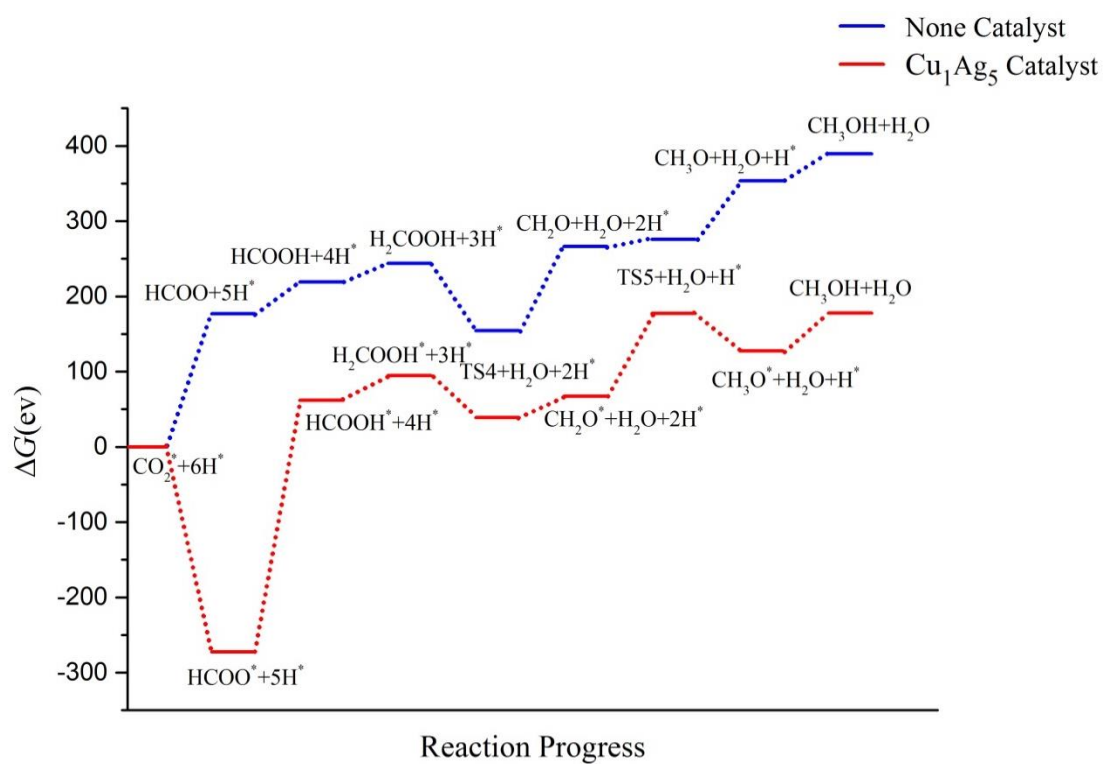

**Figure S34.** The path diagram of  $\text{CO}_2$  hydrogenation reduction to  $\text{CH}_3\text{OH}$  catalyzed by  $\text{Cu}_1\text{Ag}_5$  cluster.

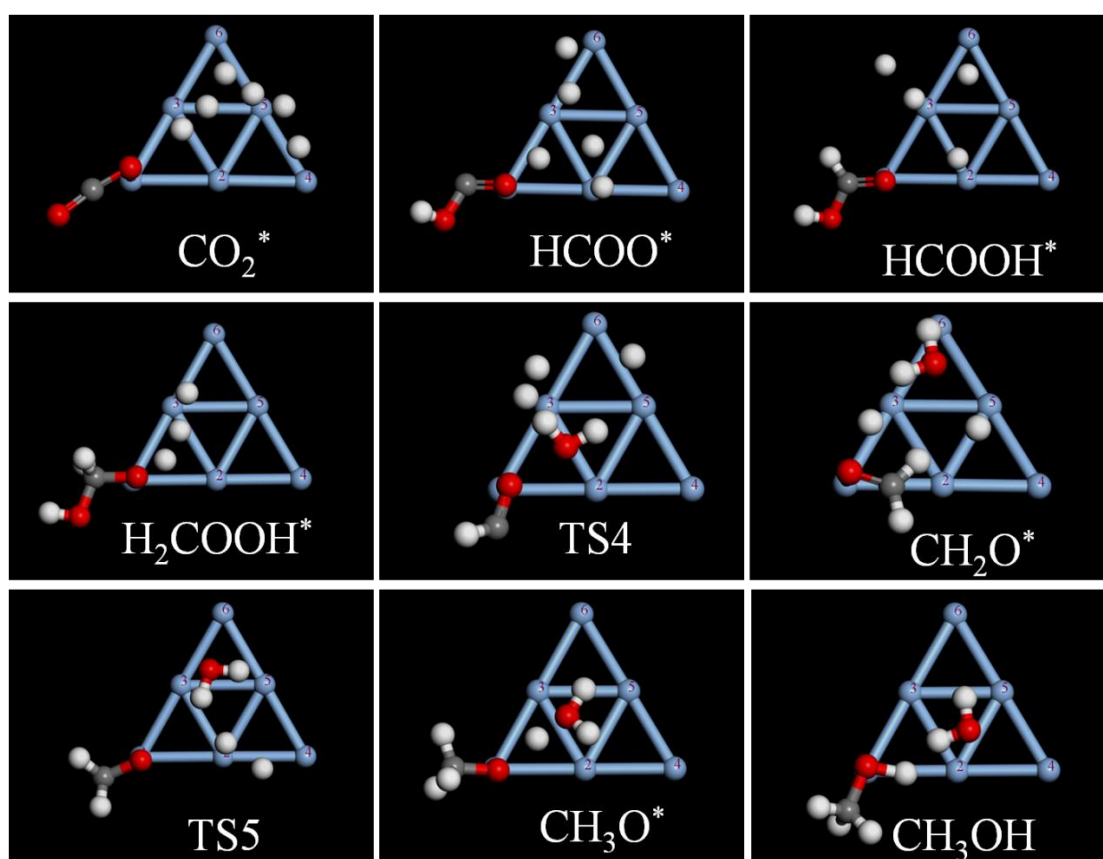

Figure S35. The path monomer adsorbed on  $\text{Ag}_6$  cluster.

Table S28. Gibbs free energy table of  $\text{Ag}_6$  clusters catalyzed by  $\text{CO}_2$  hydrogenation to  $\text{CH}_3\text{OH}$  monomer.

| intermediate                                               | $\Delta G/\text{eV}$ |
|------------------------------------------------------------|----------------------|
| $\text{CO}_2^* + 6\text{H}^*$                              | 0                    |
| $\text{HCOO}^* + 5\text{H}^*$                              | 156.275              |
| $\text{HCOOH}^* + 4\text{H}^*$                             | 115.540              |
| $\text{H}_2\text{COOH}^* + 3\text{H}^*$                    | 369.585              |
| $\text{TS4} + \text{H}_2\text{O} + 2\text{H}^*$            | 266.726              |
| $\text{CH}_2\text{O}^* + \text{H}_2\text{O} + 2\text{H}^*$ | 391.953              |
| $\text{TS5} + \text{H}_2\text{O} + \text{H}^*$             | 517.615              |
| $\text{CH}_3\text{O}^* + \text{H}_2\text{O} + \text{H}^*$  | 331.598              |
| $\text{CH}_3\text{OH} + \text{H}_2\text{O}$                | 499.329              |

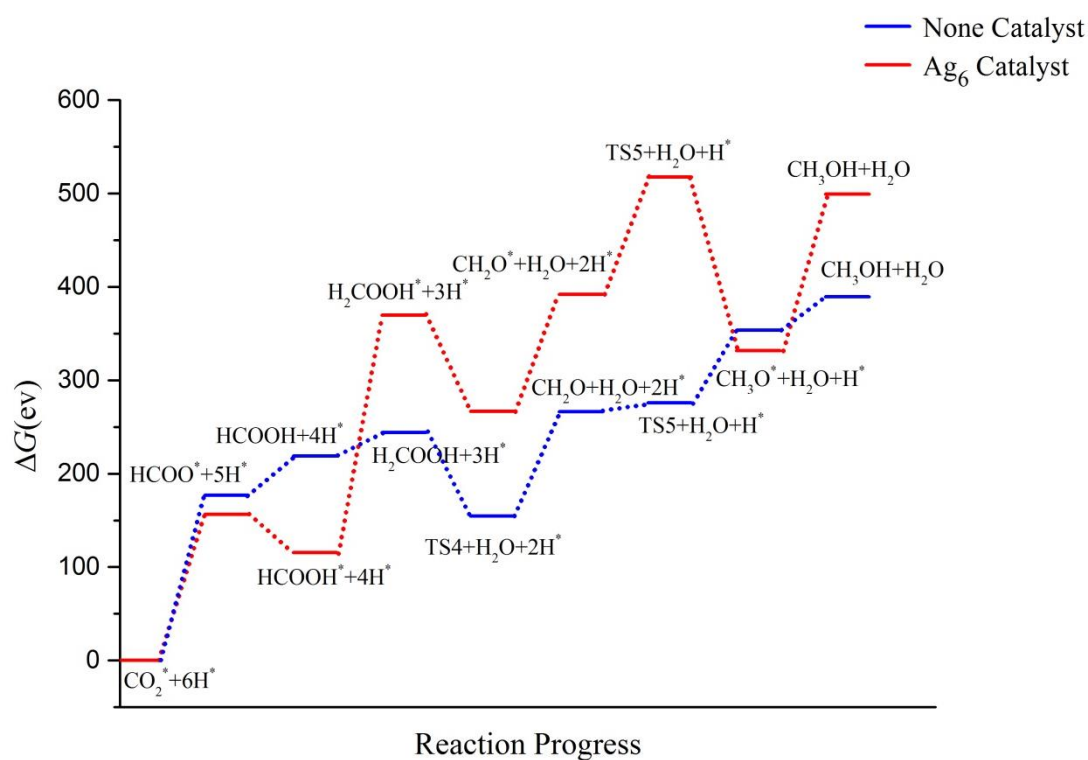

**Figure S36.** The path diagram of  $\text{CO}_2$  hydrogenation reduction to  $\text{CH}_3\text{OH}$  catalyzed by  $\text{Ag}_6$  cluster.

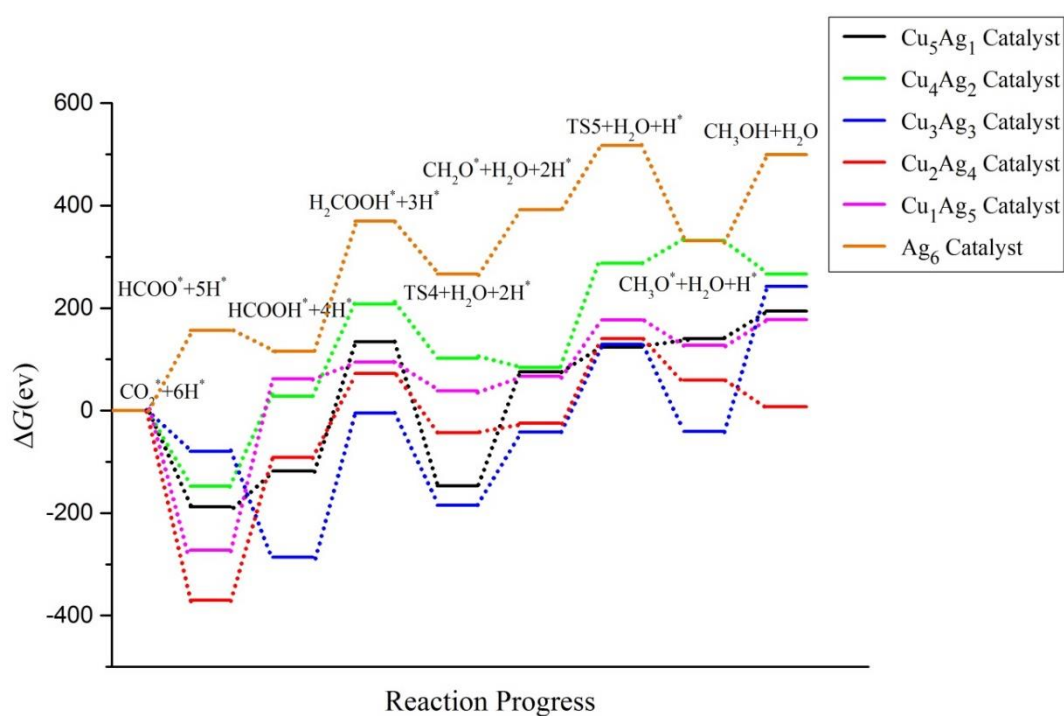

**Figure S37.** The path diagram of  $\text{CO}_2$  hydrogenation reduction to  $\text{CH}_3\text{OH}$  catalyzed by  $\text{CuAg}$  clusters.
